# Supplementary material for: Higher-order olfactory neurons in the lateral horn support odor valence and odor identity coding in Drosophila
Source: eLife. 2022 May 27;11:e74637. doi: 10.7554/eLife.74637 (PMC9142144; doi:10.7554/eLife.74637)
Supplement: Figure 2—source data 1. [file elife-74637-fig2-data1.xlsx]

## Sheet: C, D and E
Date of Exp	14.2.17 a		14.2.17 b		14.2.17 c		15.2.17 a		15.2.17 b		15.2.17 c		21.2.17 a												14.2.17 a		14.2.17 b		14.2 17 c		15.2.17 a		15.2.17 b		15.2.17 c		21.2.17 a							14.2.17 a		14.2.17 b		14.2.17 c
odor	ACP 1	ACP 2	ACP 1	ACP 2	ACP 1	ACP 2	ACP 1	ACP 2	ACP 1	ACP 2	ACP 1	ACP 2	ACP 1	ACP 2											BEZ 1	BEZ2	BEZ 1	BEZ 2	BEZ 1	BEZ 2	BEZ 1	BEZ 2	BEZ 1	BEZ 2	BEZ 1	BEZ 2	BEZ 1	BEZ 2						BUD 1	BUD 2	BUD 1	BUD 2	BUD 1	BUD 2
deltaF/F	0.153765	0.122979	0.10491	0.034165	-0.135228	-0.113374	-0.00995765	0.024286	0.16849	-0.0278646	-0.00723944	-0.0176624	0.308407	0.135355											0.497869	0.434726	0.33913	0.213978	0.0533338	-0.0230285	0.205935	0.146752	0.00335108	0.035927	0.060048	0.178756	0.643069	1.22709						0.0703154	-0.0262197	0.103859	-0.00562529	-0.130393	-0.153177
deltaF/F	0.0945247	0.119103	0.172728	0.0418957	-0.0407201	-0.0448168	0.0127763	-0.0328365	-0.0124061	-0.0674645	-0.00986924	-0.00653896	0.0435084	0.029297											0.490624	0.333047	0.49158	0.221244	-0.0508061	0.00575681	0.203011	0.133164	-0.0528466	-0.0275984	0.183598	0.159208	0.324286	0.67863						-0.0188018	-0.102435	0.193533	0.064056	-0.0272805	0.0303714
deltaF/F	0.213106	-0.0542772	0.191916	-0.0141101	-0.0602556	-0.0635927	-0.0867989	-0.099223	-0.108581	-0.159533	-0.0321104	-0.136037	0.0869463	0.00230535											0.723256	0.317968	0.5452	0.29639	0.000458566	-0.00859894	0.0765998	0.0498051	0.0783195	-0.00130366	0.130244	0.186114	0.186357	0.413627						0.0788609	-0.159208	0.00204075	-0.0574719	-0.0541721	-0.0748829
deltaF/F	0.20378	-0.0374824	0.112125	-0.00664219	-0.358073	-0.272928	-0.0801882	-0.148017	-0.115095	-0.292043	-0.187329	-0.124226	0.137584	0.0988098											0.486875	0.580514	0.433283	0.21439	-0.0972146	-0.172714	0.0983495	0.0295833	0.0418804	-0.124883	0.0823513	0.141077	0.218076	0.382447						0.0920155	-0.159742	0.194184	0.0289182	-0.32969	-0.378287
deltaF/F	0.165793	0.0889341	0.215004	0.193173	0.00195297	0.0624318	0.0619856	0.0125653	-0.0604033	0.0109531	0.151585	0.105862	0.849586	0.362004											0.489447	0.346542	0.257684	0.232723	0.082455	0.000441891	0.268623	0.263951	-0.0449447	-0.063437	0.175337	0.246664	0.819938	1.33279						0.263331	0.0217702	0.0422933	0.0137398	-0.0254295	-0.062809
deltaF/F	0.273692	0.154802	0.138012	0.0960713	0.0342297	-0.011613	0.122722	0.0220114	0.0168201	-0.0706449	0.108219	0.0659911	0.744202	0.434312											0.580961	0.434978	0.308185	0.194373	0.106039	-0.0415618	0.50057	0.418042	-0.0245504	0.0658576	0.311727	0.406184	0.988178	1.55495						0.174638	0.0349998	0.119089	0.0447688	0.031277	-0.0151415
deltaF/F	0.42883	0.266748	0.0670861	0.156423	-0.00747319	0.0148671	0.202206	0.112167	0.222535	0.112637	0.107405	0.149665	0.794565	0.570022											0.723299	0.57415	0.371707	0.192409	0.0911815	-0.00405068	0.484796	0.349301	0.237934	0.239238	0.327433	0.34111	0.935186	1.48671						0.0427502	0.0347434	0.156976	0.0434273	-0.0488765	-0.0667042
deltaF/F	0.369366	0.162116	0.0544585	0.193088	-0.0161389	0.04977	0.0894585	-0.0135037	-0.0125203	0.139926	0.048758	-0.0342113	0.550917	0.307772											0.696386	1.0023	0.412832	0.213618	0.0191571	0.0427075	0.32732	0.226027	0.0965021	0.179243	0.181383	0.215696	0.796665	1.12034						0.120845	-0.00383181	0.244397	0.204481	0.0261593	0.0223118
deltaF/F	0.298946	0.0409281	-0.0232341	-0.0041126	0.0115059	-0.0101221	0.0798539	-0.00492183	0.0464245	0.0364459	0.108564	-0.070636	0.200387	0.108118											0.479723	0.720286	0.287824	0.018509	0.0351397	0.0203404	0.451449	0.382445	0.158557	0.0643299	0.277443	0.316487	0.293901	0.478953						0.0528436	0.0546382	0.130054	-0.0523179	0.00304022	-0.0769035
deltaF/F	0.277952	-0.000644789	0.025407	-0.101305	-0.0654424	-0.20486	-0.058147	-0.0579942	0.00914738	-0.0524418	-0.160108	-0.223754	0.234017	0.0612617											0.457576	0.636193	0.388829	0.161521	-0.249996	0.0447324	0.164817	0.118648	-0.0219779	0.0401402	0.290549	0.3685	0.22644	0.359368						0.2163	-0.0417639	0.148619	-0.0492531	-0.129317	-0.10629
deltaF/F	0.152141	0.145239	0.201542	0.128081	-0.0839271	-0.0800512	0.101682	0.110525	0.0438424	0.0152396	0.223072	0.202745	1.11742	0.624253											0.482515	0.323192	0.446405	0.523037	0.205115	-0.0124626	0.181914	0.184146	-0.0812923	0.0687313	0.180653	0.353916	0.910132	1.51589						0.796354	0.272945	0.210842	0.228233	0.0303158	0.040711
deltaF/F	0.229785	0.19261	0.160478	0.188338	-0.0170736	-0.0208963	0.103719	0.0623159	0.0558612	-0.0273191	0.301436	0.149441	0.836164	0.516546											0.559465	0.359187	0.328839	0.415519	0.422845	0.00777726	0.322608	0.250856	0.0210668	0.0121056	0.303651	0.364883	0.770887	1.39579						0.674874	0.338694	0.0946729	0.164842	0.0242914	0.0467095
deltaF/F	0.240079	0.241955	0.0550027	0.109779	0.0579461	0.0422334	0.257016	0.243168	0.0932366	0.108394	0.128038	0.0831958	0.887408	0.613103											0.88429	0.548125	0.411858	0.370184	0.36307	0.0472877	0.739377	0.555488	0.0989813	0.0946047	0.253318	0.365212	0.845045	1.38052						0.619644	0.22975	0.150153	0.107427	0.0187681	-0.0024636
deltaF/F	0.365064	0.319733	0.241377	0.273943	0.157767	0.0565917	0.173154	0.169911	0.203011	0.117809	0.143402	0.0912908	1.00751	0.653814											0.765136	0.609952	0.693217	0.73278	0.168406	0.139362	0.719915	0.558381	0.290909	0.113448	0.419228	0.374744	1.09076	1.86121						0.415355	0.137659	0.323384	0.509643	0.0515118	0.0879535
deltaF/F	0.39949	0.253115	0.126844	0.36646	-0.00960248	0.125625	0.127701	0.062687	0.118763	0.0960687	0.107525	0.0251097	0.554971	0.464306											0.881144	0.741171	0.591083	0.368275	0.127844	0.014526	0.259038	0.170539	0.181285	0.250599	0.221298	0.24017	0.705017	1.04169						0.452514	0.0817825	0.239938	0.276698	0.0842539	0.0070264
deltaF/F	0.331514	0.237546	-0.0126194	0.0338591	-0.120703	-0.00654827	0.105583	-0.00681543	0.209258	0.159055	0.0165095	-0.096757	0.63462	0.38066											0.63231	0.760106	0.258984	0.155308	0.0335079	-0.0778611	0.313947	0.24342	0.129744	0.15861	0.29498	0.313152	0.381734	0.804585						0.194763	0.0427449	0.276586	0.0201327	-0.0510241	-0.063049
deltaF/F	0.297843	0.178682	-0.0159906	0.000243637	-0.0923951	-0.0536525	0.00399498	-0.0528969	0.0364275	-0.0175068	-0.144656	-0.196614	0.610554	0.52097											0.473033	0.797875	0.169354	0.0515061	-0.131397	-0.0175971	0.190207	0.140177	0.108883	0.115987	0.0453907	0.0294344	0.676772	1.00052						0.229992	0.0228257	0.0661726	-0.0879899	-0.0324377	-0.00839885
deltaF/F	-0.101813	0.180761	-0.123139	-0.134799	-0.0605974	-0.0729538	-0.185892	-0.233627	-0.0788936	-0.119989	0.0564814	-0.00499837	0.295714	0.177609											0.422903	1.22215	-0.00784881	-0.118423	-0.111879	0.0126083	-0.0582649	-0.145162	0.102123	0.172052	0.404148	0.314719	0.630658	0.754418						0.155322	-0.123644	-0.0839312	-0.115585	-0.0627168	-0.0511992
deltaF/F	0.350908	0.21043	0.168006	0.220223	0.0977157	0.0794296	0.30367	0.229904	0.167552	0.0228503	0.085143	0.0943004	1.06586	0.665936											0.471604	0.276887	0.438507	0.489483	0.164004	0.0754667	0.705864	0.571167	0.0370869	0.109769	0.128414	0.27018	0.704177	1.36885						0.900442	0.613146	0.394203	0.398483	0.124384	0.109027
deltaF/F	0.21393	0.0638755	0.0682674	0.132684	0.0579165	0.117137	0.142372	0.0413498	0.191214	0.141002	0.309079	0.124204	1.22442	0.704828											0.550404	0.553074	0.394988	0.369033	0.362479	0.0700328	0.586136	0.416456	0.11714	0.244539	0.236611	0.401739	0.95869	1.84359						0.481841	0.266999	0.272212	0.255779	0.0666122	0.0346344
deltaF/F	0.173301	0.159758	0.0685158	0.1926	0.105536	0.112937	0.150866	0.154523	0.194229	0.0798434	0.27214	0.283859	1.00592	0.641134											0.492469	0.569621	0.359404	0.305388	0.212715	0.108052	0.73087	0.514244	0.131158	0.234416	0.530013	0.578674	0.76877	1.56716						0.601648	0.383644	0.373543	0.404374	0.0939572	0.0407701
deltaF/F	0.29251	0.186115	0.120607	0.149386	0.0618666	0.0694046	0.191962	0.165487	0.180013	0.0771	0.353773	0.218561	1.2885	0.852139											0.532282	0.503288	0.403589	0.403045	0.380748	0.0862849	0.65551	0.484461	0.179222	0.175975	0.411398	0.511134	0.852628	1.6435						0.697632	0.338484	0.149089	0.147236	0.137806	0.110407
deltaF/F	0.375681	0.323222	0.121746	0.161733	0.0709771	0.0723765	0.251626	0.16334	0.245597	0.166008	0.181237	0.0635999	1.49062	0.973244											0.682022	0.860568	0.52341	0.463403	0.107771	0.0154127	0.442307	0.353538	0.267003	0.247009	0.389402	0.568441	0.913351	1.56711						0.341259	0.0739146	0.140049	0.132714	-0.10139	-0.0608559
deltaF/F	0.219812	0.243912	0.0300958	-0.0185534	-0.110318	-0.0761975	0.0638051	0.0729786	0.194526	0.121632	0.0576336	0.0236456	1.24041	0.848861											0.671238	0.84071	0.205346	0.153986	0.0980778	-0.119371	0.391693	0.252942	0.127295	0.235192	0.35335	0.350254	0.690429	1.25015						0.503028	0.170288	0.0766163	0.0864409	-0.23059	-0.211367
deltaF/F	0.209776	0.24279	0.0295029	0.142402	-0.208306	-0.12084	0.15703	0.0932841	0.233609	0.23323	0.0896676	-0.0976133	0.845497	0.711436											0.714148	0.640767	0.414057	0.306967	0.17829	-0.069652	0.456587	0.346796	0.144822	0.143314	0.152988	0.210332	0.867432	1.23554						0.356873	0.150688	0.305563	0.269183	-0.238448	-0.212721
deltaF/F	0.0925891	0.197127	-0.0295588	0.0309663	-0.0299644	-0.0741444	-0.00267274	0.000804068	0.229793	0.214062	-0.149798	-0.224231	0.514572	0.411124											0.396368	0.425108	0.330951	0.232226	0.0182941	0.078997	0.24851	0.208643	0.253862	0.312417	0.00692223	-0.0548106	0.669796	0.863134						0.20071	0.0709348	0.0907347	0.026757	-0.0167936	0.0234259
deltaF/F	-0.0270169	-0.0230229	-0.146231	-0.126068	-0.114462	-0.0350898	-0.127809	-0.152569	0.00284505	-0.00267128	-0.173853	-0.209224	0.0350342	0.0633736											0.310827	0.298277	0.0532818	-0.125291	-0.243562	-0.0624232	-0.0627053	-0.121554	0.152119	0.122387	0.0260192	0.00665246	0.0799154	0.287439						0.104067	-0.132128	-0.141804	-0.198884	-0.0716966	-0.0297246
deltaF/F	0.291605	0.0609858	0.107245	0.0316445	0.0192291	0.0534293	0.223206	0.127125	0.0418241	-0.0936421	0.198963	0.116785	0.969541	0.570913											0.806139	0.381382	0.438907	0.494935	0.327187	0.130519	0.698132	0.562753	0.0566347	0.154349	0.321577	0.300857	0.693474	1.44307						1.20991	0.648022	0.375941	0.422588	0.153862	0.120121
deltaF/F	0.287236	0.1236	0.192457	0.259434	0.117094	0.104922	0.127449	0.096209	0.300526	0.138522	0.314088	0.226078	0.87401	0.547889											0.687042	0.797658	0.583465	0.532548	0.368454	0.18798	0.781872	0.582295	0.211305	0.294524	0.369469	0.378624	0.830435	1.56375						0.634076	0.270209	0.641643	0.616228	0.197453	0.209485
deltaF/F	0.338497	0.0906235	0.046108	0.153829	0.123492	0.119354	0.342889	0.252264	0.200397	0.0845112	0.104656	0.127803	1.38673	0.682152											0.716123	0.620968	0.428061	0.349082	0.294148	0.234653	0.825599	0.712679	0.183013	0.440337	0.364482	0.353846	1.42827	1.70758						0.390215	0.185657	0.533243	0.54437	0.112686	0.0495176
deltaF/F	0.0995737	0.282276	0.120803	0.207305	0.146711	0.135431	0.178905	0.162122	0.297583	0.258329	0.296053	0.237812	0.697565	0.527242											0.469629	0.615692	0.351567	0.343809	0.322477	0.0831596	0.47552	0.421882	0.291687	0.441591	0.455437	0.453461	0.558228	1.18065						0.317269	0.301533	0.277053	0.345109	-0.0224539	-0.0106254
deltaF/F	0.239895	0.291635	0.146612	0.0614535	0.25776	0.120391	0.237124	0.252244	0.296832	0.227105	0.470973	0.280855	1.39151	0.946292											0.710313	0.867378	0.240051	0.334539	0.202923	0.153095	0.595917	0.46588	0.357677	0.456592	0.321673	0.318596	0.890675	1.46287						0.448285	0.370636	0.335235	0.162241	0.084074	0.147418
deltaF/F	0.171216	0.262784	0.32393	0.167145	-0.0235353	-0.0544012	0.300629	0.28231	0.219093	0.284646	0.361575	0.201062	1.21818	0.857391											0.484275	0.450724	0.397522	0.452489	0.0941353	0.132625	0.668378	0.492655	0.302573	0.418005	0.40579	0.525675	0.928914	1.54004						0.3623	0.222409	0.203891	0.174632	0.0249168	0.0483058
deltaF/F	0.222043	0.203888	0.219582	0.207332	-0.0355892	0.0201296	0.115685	0.0750389	0.280886	0.180528	0.102107	0.058323	0.868393	0.553145											0.50173	0.583256	0.424052	0.366653	0.381681	0.0597966	0.558028	0.370668	0.159985	0.265749	0.321526	0.345631	0.870542	1.36696						0.21374	0.134436	0.118576	0.267645	-0.125356	-0.0879976
deltaF/F	0.315851	0.242098	0.0183212	0.0810766	0.0261138	0.122657	0.0457141	0.00250067	0.273007	0.154858	-0.038402	-0.109703	0.570839	0.42062											0.412457	0.734643	0.279571	0.168511	0.135118	0.00569124	0.325798	0.237249	0.391699	0.40533	0.0910234	0.0805302	0.773065	1.27839						0.0408302	-0.0246776	0.0456679	0.0226175	-0.0207118	-0.0251691
deltaF/F	0.00136159	0.124305	-0.0995518	-0.112141	-0.234629	-0.165069	-0.0498695	-0.0403188	0.0918299	0.0431481	-0.170553	-0.24019	0.326445	0.204426											0.47035	0.163861	0.191968	0.0625303	-0.150527	-0.120736	0.0329032	-0.0256939	0.276334	0.2405	-0.194829	-0.234385	0.585905	0.829041						0.0247338	-0.0682678	-0.0588717	-0.0703092	-0.143223	-0.108472
deltaF/F	0.205062	-0.00207516	0.108728	0.000992103	0.0134887	0.0471874	0.184616	0.187949	0.0428693	-0.0827929	0.194392	0.148832	0.646752	0.301012											0.585198	0.376167	0.748592	0.632951	0.325541	0.146289	0.907743	0.755871	0.0966086	0.141744	0.42037	0.364505	0.715877	1.4427						1.13083	0.749246	0.45048	0.480193	0.122965	0.107369
deltaF/F	0.335415	0.346421	0.0497922	0.130106	0.0738769	0.147436	0.263082	0.228124	0.107989	-0.00489061	0.192913	0.228751	1.10541	0.706034											0.598705	0.420598	0.611867	0.610418	0.30799	0.330309	1.25505	0.885185	0.235798	0.299111	0.265219	0.393967	1.04934	1.68339						0.593987	0.507828	0.552786	0.506469	0.0786885	0.113221
deltaF/F	0.413167	0.16853	0.338339	0.226593	0.144812	0.0870787	0.424682	0.286191	0.0738014	0.00418121	0.36352	0.358337	1.44518	0.971654											0.777581	0.764432	0.623404	0.584293	0.375881	0.256286	0.85821	0.703507	0.282151	0.420903	0.66351	0.646775	1.12871	1.7748						0.526163	0.443501	0.163789	0.212819	0.0986416	0.194265
deltaF/F	0.397846	0.387943	0.222788	0.207782	0.194529	0.108333	0.490426	0.490602	0.402525	0.369478	0.383298	0.232186	1.37962	0.959607											0.674616	0.584309	0.351407	0.362231	0.395078	0.208422	0.656775	0.594397	0.398282	0.44271	0.635411	0.654899	1.28052	1.84023						0.555158	0.555831	0.868789	0.882918	0.120249	0.192742
deltaF/F	0.281873	0.506212	0.147879	0.315644	0.283398	0.130432	0.239254	0.168396	0.370458	0.367586	0.365368	0.220572	1.51962	1.10124											0.697602	0.603564	0.429696	0.422698	0.366489	0.268949	0.733627	0.647084	0.377495	0.482515	0.570251	0.698194	1.10389	1.72375						0.359373	0.587839	0.635539	0.586032	0.169121	0.166565
deltaF/F	0.0367223	0.4221	0.175137	0.329485	0.274157	0.0606855	0.256233	0.266843	0.374053	0.372854	0.423436	0.176204	1.51647	1.0273											0.790052	0.564274	0.469368	0.451953	0.171826	0.284083	0.688788	0.546973	0.372552	0.39706	0.722804	0.81371	1.43557	1.91881						0.500453	0.396419	0.418387	0.56906	0.070797	0.115166
deltaF/F	0.298932	0.235386	0.400465	0.362485	-0.0445461	0.072215	0.141483	0.0404507	0.358994	0.252516	0.103593	-0.0125771	0.7378	0.560059											0.453223	0.498386	0.476731	0.350277	0.149067	0.052221	0.407823	0.298328	0.402438	0.451925	0.137766	0.249116	1.1187	1.61407						0.609755	0.249832	0.258145	0.235428	-0.128838	-0.0106144
deltaF/F	0.2613	0.111819	0.0630637	0.103856	-0.125808	-0.0529858	0.0849516	0.0579246	0.197848	0.187501	-0.00240246	-0.0421266	0.376406	0.273283											0.627644	0.559262	0.269208	0.203101	0.091507	-0.0589322	0.172932	0.151222	0.51416	0.526729	0.0155008	0.0528103	0.60835	0.841028						0.303106	0.240619	0.0319081	0.0514998	-0.154642	-0.108871
deltaF/F	0.145065	0.173027	-0.0152168	-0.0369583	-0.22398	-0.174984	-0.0424328	-0.100582	0.112623	0.0935796	-0.0875715	-0.136994	0.13989	0.100972											0.82908	0.399914	0.156248	0.119277	-0.230239	-0.152044	-0.0225486	-0.0462587	0.172573	0.324472	-0.0448449	-0.0178045	0.272368	0.606775						-0.0839899	0.11033	0.0336564	0.0218198	-0.193378	-0.201819
deltaF/F	0.0469181	0.0196135	0.215504	0.193607	-0.102101	-0.0809186	0.168773	0.228482	0.0608171	-0.0706935	0.403624	0.327172	1.00864	0.790193											0.40831	0.343125	0.513206	0.61685	0.267795	0.221418	1.01135	0.891066	0.263113	0.243989	0.409625	0.540307	1.34181	2.15342						0.524029	0.777146	0.403937	0.492901	0.0128297	0.107542
deltaF/F	0.395133	0.328368	0.591201	0.676089	0.0466134	0.213035	0.339715	0.339656	0.128563	0.060974	0.387367	0.243717	0.714994	0.432278											0.447048	0.428232	0.474923	0.535617	0.347481	0.255759	1.17348	0.869778	0.515849	0.414211	0.454066	0.624986	1.61614	2.08121						0.385974	0.569765	0.397263	0.40404	0.0643835	0.0854792
deltaF/F	0.80292	0.750298	0.324096	0.444967	0.0998437	0.056278	0.477318	0.45422	0.373539	0.162822	0.496442	0.431053	1.35237	1.02983											0.431902	0.31918	0.84192	0.832832	0.370628	0.236664	1.06912	0.943115	0.468194	0.454838	0.853767	1.00249	1.4644	1.94014						0.502176	0.592099	0.525144	0.472004	0.0787512	0.0374538
deltaF/F	0.520261	0.821761	0.441916	0.474905	0.0905219	0.122692	0.320729	0.190703	0.356144	0.253387	0.303054	0.272474	1.41403	1.06216											0.415221	0.372596	0.614218	0.55162	0.482695	0.203232	1.08947	0.914407	0.506549	0.424384	0.943292	0.902025	0.972899	1.3929						0.30904	0.3026	0.705366	0.76699	0.103374	0.0997591
deltaF/F	0.219585	0.976264	0.754059	0.74012	0.123527	0.127187	0.32041	0.256728	0.236486	0.187658	0.292083	0.132077	0.694047	0.56545											0.435855	0.465785	0.974262	0.701748	0.298644	0.383445	0.884329	0.790222	0.603017	0.672177	0.75242	0.74102	1.41399	1.71659						0.347082	0.286861	0.694368	0.692307	0.106567	0.112654
deltaF/F	0.111897	0.735076	0.413847	0.478086	0.137337	0.115873	0.142275	0.133475	0.513645	0.461095	0.20052	0.106481	0.671978	0.56205											0.639203	0.616985	0.326294	0.331187	0.336669	0.126365	0.856328	0.651676	0.643209	0.623283	0.463063	0.51426	1.1379	1.57282						0.502154	0.305612	0.233368	0.274149	-0.00277037	0.0568987
deltaF/F	0.165278	0.315521	0.0934315	0.126076	-0.0177865	-0.0115673	0.0591645	0.0361041	0.233146	0.330117	-0.00878632	-0.0346156	0.543552	0.470012											0.746269	0.491995	0.280646	0.261447	0.181074	0.0220464	0.0797339	0.0698104	0.54303	0.809367	0.128751	0.0604773	0.608735	1.00464						0.293453	0.144122	0.114767	0.125452	-0.10624	-0.098095
deltaF/F	0.0538282	0.245454	0.0111941	0.00886966	-0.122022	-0.0562204	-0.0343799	0.0238433	0.143127	0.152433	-0.0867887	-0.126305	0.111342	0.106831											0.147989	0.287944	0.0988194	0.0408022	0.0279645	-0.0206632	-0.0612342	-0.0105237	0.385166	0.473351	-0.0681882	-0.0438797	0.186079	0.449705						0.186709	0.0702922	-0.083563	-0.0750166	-0.0348107	-0.0624002
deltaF/F	0.039937	0.0442577	0.515981	0.421588	0.123597	0.0361735	0.130664	0.0849753	0.0535806	0.0405541	0.297886	0.290977	0.727659	0.490135											0.280043	0.0573663	0.986819	0.873201	0.376101	0.247002	0.391323	0.421123	0.325545	0.176571	0.597141	0.822357	1.27957	1.971						0.613385	0.14076	0.587811	0.609048	0.00891445	0.167719
deltaF/F	0.313444	0.302708	0.324385	0.416509	0.155995	0.14503	0.180785	0.0946208	0.275708	0.188968	0.64584	0.429594	0.708751	0.440986											0.388631	0.686279	0.698365	0.510495	0.538784	0.271746	0.934182	0.865679	0.452117	0.671175	1.00991	1.01818	1.54864	2.00869						0.675606	0.520085	0.411483	0.468087	0.103626	0.110334
deltaF/F	0.272856	0.404481	0.43632	0.549157	0.0806679	0.214034	0.301306	0.150971	0.37954	0.310875	0.375768	0.171015	1.63534	1.29646											0.80204	0.664931	0.979973	0.872527	0.501451	0.352907	1.02121	0.986262	0.623398	0.788651	1.42426	1.39748	1.46184	2.06671						0.809236	0.859763	0.912278	0.951291	0.12753	0.0894462
deltaF/F	0.173369	0.323888	0.356094	0.438194	0.0540196	0.186719	0.223022	0.15169	0.413755	0.31876	0.240323	0.109292	1.46436	1.09926											0.676288	0.373434	0.948996	0.633602	0.311336	0.259693	0.81279	0.666459	0.815501	1.05329	0.602104	0.636502	0.876068	1.30699						0.702744	0.374018	0.591569	0.618604	0.159685	0.206994
deltaF/F	0.144308	0.370514	0.197363	0.293614	0.0463388	0.11176	0.143467	0.0807648	0.382543	0.36751	0.138769	0.0396088	0.734184	0.593709											0.560512	0.240731	0.334494	0.324389	0.361528	0.0791877	0.227759	0.288704	0.7517	0.811322	0.169798	0.152208	0.956414	1.24906						0.690835	0.16364	0.216044	0.215686	0.0314339	0.0246146
deltaF/F	0.0165173	0.147456	0.0597028	0.0456623	0.0851588	0.0917604	0.0683209	0.0808124	0.216336	0.380407	-0.0310145	-0.0804092	0.211719	0.118795											0.407425	0.276565	0.188922	0.210066	0.322095	0.318801	0.126144	0.0863519	0.652808	0.843276	-0.0899562	-0.024559	0.560829	0.74267						0.00931242	-0.0131763	0.0206184	0.0481522	0.0639005	0.0850281
deltaF/F	-0.0243709	0.12382	0.0738365	0.0727935	-0.092999	-0.0747447	-0.0431851	-0.0327566	0.211197	0.197594	-0.0733983	-0.139549	0.192835	0.117323											0.217211	0.104345	0.217403	0.0607086	-0.0384755	-0.105797	-0.0450877	-0.0785545	0.241534	0.32576	-0.0348533	-0.0493089	0.16617	0.324384						0.0431561	-0.0517757	-0.0204693	-0.101109	-0.109825	-0.0587405
deltaF/F	-0.143853	-0.0784547	0.531512	0.541206	-0.123799	0.0642634	0.029103	-0.033346	0.104465	-0.0521143	0.10441	0.129998	0.410852	0.334932											-0.102457	0.0240038	0.574147	0.405351	0.314503	0.00453859	-0.0133016	-0.011318	0.0909872	0.268921	1.17136	1.03815	0.387552	0.446635						0.120356	-0.00722336	0.67677	0.635373	0.0156069	0.0154763
deltaF/F	-0.0764718	-0.0299729	0.400121	0.460672	-0.069292	0.146175	0.106471	0.0567279	0.234192	0.118201	0.202356	0.293296	0.203363	0.116412											0.00606003	0.0294442	0.798754	0.717748	0.248633	0.0957336	0.0832144	0.0971323	0.638841	0.928961	0.91362	1.05569	0.235069	0.307801						0.101246	-0.0379035	0.913569	1.03944	0.0805758	0.0793233
deltaF/F	-0.100974	0.0462254	0.292188	0.379421	-0.245197	-0.0512102	-0.00795226	0.0997896	0.406134	0.511313	0.087811	0.072031	0.583059	0.424141											0.248693	0.029042	0.857397	0.777406	0.0669752	-0.0809473	0.11578	-0.00319673	0.6451	0.883104	0.595546	0.672929	0.451432	0.463803						-0.0184354	0.017241	1.03596	1.16754	-0.0471057	-0.0503199
deltaF/F	-0.0453783	-0.027611	0.15749	0.20464	0.0978715	0.163249	0.0523085	0.0394766	0.457067	0.498262	0.0391226	0.0135326	0.036819	0.0926558											0.111553	0.103937	0.590498	0.412854	0.129678	0.145793	0.0332839	0.00483938	0.520096	0.661869	0.182211	0.192657	0.305837	0.378399						0.0192217	0.00660317	0.215924	0.302606	0.0511064	0.138914
deltaF/F	0.0248515	0.0501415	0.0538481	0.0641916	-0.0936373	-0.105968	0.00689404	-0.00606982	0.283046	0.259294	-0.0676778	-0.0581942	0.0455527	0.0436658											0.0368078	0.0141557	0.0559783	0.0204314	-0.0724016	-0.0427932	0.0947111	0.017108	0.570673	0.523299	-0.0953494	-0.0679986	0.169815	0.122845						-0.0190494	-0.0424212	-0.0464956	-0.049782	-0.130258	-0.0337884
Average Correlation coefficient			repeated stimulus	across odor
			0.89844	0.72394	0.71076	0.66851	0.68703	0.67902	0.67484	0.62883								lower plane	middle plane	upper plane
			0.92718		0.80365	0.81716	0.79121	0.85699	0.73056	0.4476					Average Corr Coeff		PN	0.248245	0.229673	0.371207
			0.94433			0.83787	0.79515	0.76585	0.69466	0.40258					Average Corr Coeff		LHN	0.585209	0.596491	0.455621
			0.93958				0.83678	0.78751	0.76676	0.40629
			0.95746					0.90618	0.83399	0.53653						SEM	PN	0.0120217	0.0133426	0.0123691
			0.95799						0.79402	0.56376							LHN	0.0152645	0.0197008	0.0125939
			0.83027							0.51405
			0.93473
		average	0.923747	0.702217
		TTEST	9.35521e-05
[truncated: 78 more columns]

## Sheet: F
Correlation coefficient of LHN response across odor for individual animal
		Ace_Ace	BUD	ETA	G-BUT	PAC	PHA	VIN	43374	ACP	BEA	GEO	LINA	MSC	cVA	LIM
	Ace_Ace 1	1	0.655787	0.609917	0.47371	0.479447	0.70475	0.55885	0.596477	0.735283	0.729047	0.213207	0.74303	0.685343	0.461816	0.499063
	Ace_Ace 2	1	0.299803	0.403196	0.023214	0.107407	0.161439	0.70818	0.301294	0.0352953	0.097393	0.124605	0.356827	0.155687	0.2571	0.64575
	Ace_Ace 3	1	0.766833	0.678927	0.332872	0.54801	0.57803	0.81411	0.457173	0.680367	0.323069	0.614167	0.5933	0.450247	0.659453	0.587407
	Ace_Ace 4	1	0.80837	0.761707	0.268645	0.65332	0.5703	0.69912	0.53989	0.651647	0.536513	0.295323	0.579617	0.557453	0.588263	0.703043
	Ace_Ace 5	1	0.661793	0.743043	0.401943	0.280257	0.41231	0.697477	0.458397	0.63026	0.551087	0.308569	0.51763	0.5882	0.521863	0.621477
	Ace_Ace 6	1	0.697613	0.69312	0.450285	0.448527	0.650527	0.66777	0.511107	0.61112	0.635067	0.446492	0.587243	0.695663	0.672577	0.66474
	Ace_Ace 7	1	0.69384	0.737225	0.43637	0.39125	0.54042	0.677445	0.388298	0.509195	0.356905	0.613165	0.783495	0.482565	0.66985	0.64344
	BUD 1	0.655787	1	0.491677	0.56546	0.701933	0.710323	0.50341	0.37995	0.612867	0.558587	0.46886	0.569	0.52133	0.630917	0.630577
	BUD 2	0.299803	1	0.35626	-0.0357767	0.500003	0.348177	0.187662	0.194326	0.33467	-0.0518827	0.161007	0.231309	0.036154	-0.018794	0.204221
	BUD 3	0.766833	1	0.64091	0.351575	0.727803	0.619513	0.706967	0.49958	0.739913	0.296519	0.602593	0.585413	0.404907	0.678843	0.616953
	BUD 4	0.80837	1	0.710557	0.389263	0.821207	0.661007	0.736987	0.469397	0.574697	0.414083	0.449497	0.57492	0.473627	0.602327	0.757393
	BUD 5	0.661793	1	0.841527	0.444007	0.727477	0.662247	0.805427	0.40895	0.77288	0.466157	0.576437	0.642747	0.417582	0.688317	0.576127
	BUD 6	0.697613	1	0.56861	0.376033	0.67112	0.70366	0.599523	0.450963	0.5241	0.649697	0.407713	0.412997	0.60985	0.676877	0.629427
	BUD 7	0.69384	1	0.77568	0.541755	0.76431	0.587765	0.473375	0.375102	0.6044	0.401225	0.603595	0.75494	0.560885	0.64349	0.62388
	ETA 1	0.609917	0.491677	1	0.504397	0.582697	0.729467	0.720667	0.250432	0.555587	0.407939	0.235133	0.597573	0.585713	0.443537	0.625203
	ETA 2	0.403196	0.35626	1	0.45433	0.099708	0.156712	0.49284	-0.0233563	0.0468623	0.10462	0.189267	0.329843	0.12798	0.128287	0.415705
	ETA 3	0.678927	0.64091	1	0.52059	0.477163	0.373343	0.720463	0.487427	0.651273	0.491457	0.626007	0.546567	0.47457	0.700083	0.75529
	ETA 4	0.761707	0.710557	1	0.47405	0.50527	0.505883	0.635633	0.512397	0.627	0.55801	0.29343	0.611833	0.60637	0.6815	0.668633
	ETA 5	0.743043	0.841527	1	0.548293	0.53607	0.491747	0.78662	0.361443	0.693707	0.423723	0.493797	0.616603	0.468491	0.6447	0.583643
	ETA 6	0.69312	0.56861	1	0.571327	0.364475	0.459873	0.47368	0.336764	0.359331	0.452267	0.482839	0.364313	0.593777	0.465123	0.46468
	ETA 7	0.737225	0.77568	1	0.597435	0.43189	0.46171	0.6314	0.313493	0.573475	0.267877	0.631175	0.81188	0.66149	0.759445	0.6482
	G-BUT 1	0.47371	0.56546	0.504397	1	0.619513	0.58097	0.422123	0.367807	0.48735	0.274122	0.35304	0.43116	0.46061	0.537627	0.571017
	G-BUT 2	0.023214	-0.0357767	0.45433	1	-0.168433	0.1614	0.16644	0.103187	0.0192067	0.346457	0.304537	0.316933	0.0721753	0.317867	0.129022
	G-BUT 3	0.332872	0.351575	0.52059	1	0.224648	0.235439	0.281203	0.497037	0.380053	0.49146	0.30364	0.394577	0.330657	0.38593	0.38307
	G-BUT 4	0.268645	0.389263	0.47405	1	0.280997	0.37392	0.184966	0.368377	0.369223	0.284747	0.40494	0.335926	0.32014	0.39115	0.41904
	G-BUT 5	0.401943	0.444007	0.548293	1	0.260075	0.461487	0.39159	0.542853	0.478363	0.555507	0.486707	0.56721	0.534767	0.391391	0.426613
	G-BUT 6	0.450285	0.376033	0.571327	1	0.273003	0.425163	0.497027	0.2666	0.287984	0.373173	0.26863	0.37556	0.457633	0.504997	0.461553
	G-BUT 7	0.43637	0.541755	0.597435	1	0.32975	0.173433	0.139635	0.452015	0.43351	0.207535	0.366955	0.522815	0.3998	0.53415	0.40032
	PAC 1	0.479447	0.701933	0.582697	0.619513	1	0.683853	0.620773	0.228804	0.515913	0.43665	0.480347	0.412967	0.472883	0.548933	0.688297
	PAC 2	0.107407	0.500003	0.099708	-0.168433	1	0.260971	0.03567	0.0556118	0.197507	-0.0878654	0.117275	0.137788	-0.024559	-0.048818	0.0193593
	PAC 3	0.54801	0.727803	0.477163	0.224648	1	0.475523	0.506127	0.270393	0.632333	0.081642	0.612713	0.422643	0.327737	0.38414	0.459557
	PAC 4	0.65332	0.821207	0.50527	0.280997	1	0.577067	0.652663	0.396487	0.420307	0.26784	0.457747	0.414207	0.29487	0.482043	0.708233
	PAC 5	0.280257	0.727477	0.53607	0.260075	1	0.602437	0.561463	0.269613	0.589357	0.305537	0.519023	0.404593	0.152607	0.435033	0.377033
	PAC 6	0.448527	0.67112	0.364475	0.273003	1	0.704897	0.361617	0.381211	0.494757	0.598803	0.282302	0.37585	0.388397	0.455987	0.465632
	PAC 7	0.39125	0.76431	0.43189	0.32975	1	0.671975	0.29432	0.16483	0.440975	0.437375	0.50477	0.52234	0.275606	0.273045	0.52322
	PHA 1	0.70475	0.710323	0.729467	0.58097	0.683853	1	0.711	0.582863	0.80543	0.623217	0.42207	0.742557	0.721643	0.51972	0.673157
	PHA 2	0.161439	0.348177	0.156712	0.1614	0.260971	1	0.148243	0.360633	0.461603	0.26045	0.295277	0.419127	0.226588	0.18329	0.0880467
	PHA 3	0.57803	0.619513	0.373343	0.235439	0.475523	1	0.60002	0.568713	0.642713	0.455719	0.475927	0.566417	0.436377	0.466267	0.5168
	PHA 4	0.5703	0.661007	0.505883	0.37392	0.577067	1	0.5129	0.60516	0.53687	0.391113	0.387337	0.530317	0.461353	0.454927	0.55545
	PHA 5	0.41231	0.662247	0.491747	0.461487	0.602437	1	0.612023	0.62115	0.768537	0.655473	0.626773	0.679397	0.439607	0.488683	0.624607
	PHA 6	0.650527	0.70366	0.459873	0.425163	0.704897	1	0.552613	0.446434	0.638977	0.560893	0.359581	0.5428	0.453313	0.576953	0.660943
	PHA 7	0.54042	0.587765	0.46171	0.173433	0.671975	1	0.65108	0.08173	0.49408	0.438525	0.649695	0.5761	0.35061	0.46082	0.713985
	VIN 1	0.55885	0.50341	0.720667	0.422123	0.620773	0.711	1	0.34936	0.602547	0.469389	0.23627	0.568653	0.506587	0.403883	0.677263
	VIN 2	0.70818	0.187662	0.49284	0.16644	0.03567	0.148243	1	0.213953	0.00350667	0.155553	0.196378	0.439896	0.2921	0.36898	0.614327
	VIN 3	0.81411	0.706967	0.720463	0.281203	0.506127	0.60002	1	0.487183	0.6664	0.500207	0.688873	0.65392	0.44064	0.731883	0.72852
	VIN 4	0.69912	0.736987	0.635633	0.184966	0.652663	0.5129	1	0.47211	0.564027	0.394875	0.32056	0.590813	0.510263	0.678047	0.747687
	VIN 5	0.697477	0.805427	0.78662	0.39159	0.561463	0.612023	1	0.422733	0.779093	0.46608	0.512743	0.61843	0.416903	0.729517	0.645043
	VIN 6	0.66777	0.599523	0.47368	0.497027	0.361617	0.552613	1	0.310287	0.54413	0.477047	0.273473	0.59885	0.562843	0.726463	0.674227
	VIN 7	0.677445	0.473375	0.6314	0.139635	0.29432	0.65108	1	0.08113	0.403645	0.172415	0.60154	0.56751	0.41365	0.60335	0.71931
	1- Octanol 1	0.596477	0.37995	0.250432	0.367807	0.228804	0.582863	0.34936	1	0.730307	0.569723	0.2881	0.661153	0.660197	0.294516	0.331203
	1- Octanol 2	0.301294	0.194326	-0.0233563	0.103187	0.0556118	0.360633	0.213953	1	0.388133	0.19128	0.17282	0.206307	0.04785	0.166259	0.172773
	1- Octanol 3	0.457173	0.49958	0.487427	0.497037	0.270393	0.568713	0.487183	1	0.65263	0.519163	0.46329	0.53665	0.498277	0.524533	0.463243
	1- Octanol 4	0.53989	0.469397	0.512397	0.368377	0.396487	0.60516	0.47211	1	0.66533	0.563337	0.316347	0.593617	0.609357	0.60717	0.49772
	1- Octanol 5	0.458397	0.40895	0.361443	0.542853	0.269613	0.62115	0.422733	1	0.65419	0.74743	0.441933	0.722077	0.538173	0.442167	0.450949
	1- Octanol 6	0.511107	0.450963	0.336764	0.2666	0.381211	0.446434	0.310287	1	0.62115	0.58475	0.240138	0.42364	0.626403	0.467817	0.57551
	1- Octanol 7	0.388298	0.375102	0.313493	0.452015	0.16483	0.08173	0.08113	1	0.465183	0.449957	0.226173	0.463477	0.564545	0.435518	0.264024
	ACP 1	0.735283	0.612867	0.555587	0.48735	0.515913	0.80543	0.602547	0.730307	1	0.67932	0.381867	0.762407	0.781703	0.426707	0.561263
	ACP 2	0.0352953	0.33467	0.0468623	0.0192067	0.197507	0.461603	0.00350667	0.388133	1	0.472683	0.229465	0.320733	0.267217	0.256754	0.143666
	ACP 3	0.680367	0.739913	0.651273	0.380053	0.632333	0.642713	0.6664	0.65263	1	0.403504	0.647467	0.574467	0.503673	0.60657	0.700833
	ACP 4	0.651647	0.574697	0.627	0.369223	0.420307	0.53687	0.564027	0.66533	1	0.676607	0.375523	0.543323	0.725563	0.631683	0.557343
	ACP 5	0.63026	0.77288	0.693707	0.478363	0.589357	0.768537	0.779093	0.65419	1	0.70273	0.62798	0.782987	0.513183	0.681083	0.650547
	ACP 6	0.61112	0.5241	0.359331	0.287984	0.494757	0.638977	0.54413	0.62115	1	0.615333	0.242538	0.537703	0.552027	0.605987	0.78253
	ACP 7	0.509195	0.6044	0.573475	0.43351	0.440975	0.49408	0.403645	0.465183	1	0.64972	0.45735	0.709715	0.594215	0.62856	0.523355
	BEA 1	0.729047	0.558587	0.407939	0.274122	0.43665	0.623217	0.469389	0.569723	0.67932	1	0.205143	0.649877	0.688527	0.33885	0.37648
	BEA 2	0.097393	-0.0518827	0.10462	0.346457	-0.0878654	0.26045	0.155553	0.19128	0.472683	1	0.22768	0.588583	0.45716	0.534313	0.273467
	BEA 3	0.323069	0.296519	0.491457	0.49146	0.081642	0.455719	0.500207	0.519163	0.403504	1	0.385682	0.55118	0.541944	0.509087	0.60632
	BEA 4	0.536513	0.414083	0.55801	0.284747	0.26784	0.391113	0.394875	0.563337	0.676607	1	0.171743	0.442	0.73989	0.547713	0.452063
	BEA 5	0.551087	0.466157	0.423723	0.555507	0.305537	0.655473	0.46608	0.74743	0.70273	1	0.436007	0.608733	0.570417	0.432793	0.547823
	BEA 6	0.635067	0.649697	0.452267	0.373173	0.598803	0.560893	0.477047	0.58475	0.615333	1	0.325682	0.509837	0.56994	0.64533	0.59575
	BEA 7	0.356905	0.401225	0.267877	0.207535	0.437375	0.438525	0.172415	0.449957	0.64972	1	0.18901	0.497755	0.431835	0.304638	0.30657
	GEO 1	0.213207	0.46886	0.235133	0.35304	0.480347	0.42207	0.23627	0.2881	0.381867	0.205143	1	0.242117	0.293983	0.42392	0.447095
	GEO 2	0.124605	0.161007	0.189267	0.304537	0.117275	0.295277	0.196378	0.17282	0.229465	0.22768	1	0.39877	0.163635	0.154295	0.148425
	GEO 3	0.614167	0.602593	0.626007	0.30364	0.612713	0.475927	0.688873	0.46329	0.647467	0.385682	1	0.632567	0.442227	0.6023	0.600003
	GEO 4	0.295323	0.449497	0.29343	0.40494	0.457747	0.387337	0.32056	0.316347	0.375523	0.171743	1	0.250923	0.321493	0.352493	0.479623
	GEO 5	0.308569	0.576437	0.493797	0.486707	0.519023	0.626773	0.512743	0.441933	0.62798	0.436007	1	0.611937	0.334207	0.517427	0.600403
	GEO 6	0.446492	0.407713	0.482839	0.26863	0.282302	0.359581	0.273473	0.240138	0.242538	0.325682	1	0.211847	0.391374	0.366313	0.25501
	GEO 7	0.613165	0.603595	0.631175	0.366955	0.50477	0.649695	0.60154	0.226173	0.45735	0.18901	1	0.6137	0.411595	0.573975	0.753055
	LINA 1	0.74303	0.569	0.597573	0.43116	0.412967	0.742557	0.568653	0.661153	0.762407	0.649877	0.242117	1	0.79761	0.44374	0.5185
	LINA 2	0.356827	0.231309	0.329843	0.316933	0.137788	0.419127	0.439896	0.206307	0.320733	0.588583	0.39877	1	0.600627	0.539343	0.36915
	LINA 3	0.5933	0.585413	0.546567	0.394577	0.422643	0.566417	0.65392	0.53665	0.574467	0.55118	0.632567	1	0.462917	0.722323	0.597283
	LINA 4	0.579617	0.57492	0.611833	0.335926	0.414207	0.530317	0.590813	0.593617	0.543323	0.442	0.250923	1	0.67409	0.68094	0.58907
	LINA 5	0.51763	0.642747	0.616603	0.56721	0.404593	0.679397	0.61843	0.722077	0.782987	0.608733	0.611937	1	0.610467	0.694223	0.661887
	LINA 6	0.587243	0.412997	0.364313	0.37556	0.37585	0.5428	0.59885	0.42364	0.537703	0.509837	0.211847	1	0.51135	0.59397	0.62571
	LINA 7	0.783495	0.75494	0.81188	0.522815	0.52234	0.5761	0.56751	0.463477	0.709715	0.497755	0.6137	1	0.741975	0.699855	0.658445
	MSC 1	0.685343	0.52133	0.585713	0.46061	0.472883	0.721643	0.506587	0.660197	0.781703	0.688527	0.293983	0.79761	1	0.354453	0.50023
	MSC 2	0.155687	0.036154	0.12798	0.0721753	-0.024559	0.226588	0.2921	0.04785	0.267217	0.45716	0.163635	0.600627	1	0.45876	0.281403
	MSC 3	0.450247	0.404907	0.47457	0.330657	0.327737	0.436377	0.44064	0.498277	0.503673	0.541944	0.442227	0.462917	1	0.416599	0.52139
	MSC 4	0.557453	0.473627	0.60637	0.32014	0.29487	0.461353	0.510263	0.609357	0.725563	0.73989	0.321493	0.67409	1	0.713577	0.525043
	MSC 5	0.5882	0.417582	0.468491	0.534767	0.152607	0.439607	0.416903	0.538173	0.513183	0.570417	0.334207	0.610467	1	0.49899	0.541043
	MSC 6	0.695663	0.60985	0.593777	0.457633	0.388397	0.453313	0.562843	0.626403	0.552027	0.56994	0.391374	0.51135	1	0.6267	0.64078
	MSC 7	0.482565	0.560885	0.66149	0.3998	0.275606	0.35061	0.41365	0.564545	0.594215	0.431835	0.411595	0.741975	1	0.657125	0.51261
	cVA 1	0.461816	0.630917	0.443537	0.537627	0.548933	0.51972	0.403883	0.294516	0.426707	0.33885	0.42392	0.44374	0.354453	1	0.5071
	cVA 2	0.2571	-0.018794	0.128287	0.317867	-0.048818	0.18329	0.36898	0.166259	0.256754	0.534313	0.154295	0.539343	0.45876	1	0.330283
	cVA 3	0.659453	0.678843	0.700083	0.38593	0.38414	0.466267	0.731883	0.524533	0.60657	0.509087	0.6023	0.722323	0.416599	1	0.60587
	cVA 4	0.588263	0.602327	0.6815	0.39115	0.482043	0.454927	0.678047	0.60717	0.631683	0.547713	0.352493	0.68094	0.713577	1	0.735697
	cVA 5	0.521863	0.688317	0.6447	0.391391	0.435033	0.488683	0.729517	0.442167	0.681083	0.432793	0.517427	0.694223	0.49899	1	0.598357
	cVA 6	0.672577	0.676877	0.465123	0.504997	0.455987	0.576953	0.726463	0.467817	0.605987	0.64533	0.366313	0.59397	0.6267	1	0.66334
	cVA 7	0.66985	0.64349	0.759445	0.53415	0.273045	0.46082	0.60335	0.435518	0.62856	0.304638	0.573975	0.699855	0.657125	1	0.67632
	LIM 1	0.499063	0.630577	0.625203	0.571017	0.688297	0.673157	0.677263	0.331203	0.561263	0.37648	0.447095	0.5185	0.50023	0.5071	1
	LIM 2	0.64575	0.204221	0.415705	0.129022	0.0193593	0.0880467	0.614327	0.172773	0.143666	0.273467	0.148425	0.36915	0.281403	0.330283	1
	LIM 3	0.587407	0.616953	0.75529	0.38307	0.459557	0.5168	0.72852	0.463243	0.700833	0.60632	0.600003	0.597283	0.52139	0.60587	1
	LIM 4	0.703043	0.757393	0.668633	0.41904	0.708233	0.55545	0.747687	0.49772	0.557343	0.452063	0.479623	0.58907	0.525043	0.735697	1
	LIM 5	0.621477	0.576127	0.583643	0.426613	0.377033	0.624607	0.645043	0.450949	0.650547	0.547823	0.600403	0.661887	0.541043	0.598357	1
	LIM 6	0.66474	0.629427	0.46468	0.461553	0.465632	0.660943	0.674227	0.57551	0.78253	0.59575	0.25501	0.62571	0.64078	0.66334	1
	LIM 7	0.64344	0.62388	0.6482	0.40032	0.52322	0.713985	0.71931	0.264024	0.523355	0.30657	0.753055	0.658445	0.51261	0.67632	1

## Sheet: G
Correlation coefficient of PN response across odor for individual animal
	Ace_Ace	BUD	ETA	G-BUT	PAC	PHA	VIN	43739	ACP	BEA	GEO	LINA	MSC	cVA
Ace_Ace 1	1	0.3632	0.57326	0.50488	0.01853	0.30137	0.028015	0.038031	-0.16704	0.13315	0.29103	0.23738	-0.21562	0.23339
Ace_Ace 2	1	0.554913	0.39776	0.25293	0.215675	0.515697	0.3606	0.226877	0.184109	0.355265	0.428677	0.236087	-0.0624333	0.08592
Ace_Ace 3	1	0.37591	0.540337	0.189063	0.147303	0.28412	0.0192104	0.169669	0.169513	0.522753	0.218487	0.155495	0.082055	-0.0696273
Ace_Ace 4	1	0.270807	0.341764	0.273357	0.172719	0.46413	0.254473	0.46165	-0.0592523	0.715753	0.358337	0.279797	0.212765	0.129248
Ace_Ace 5	1	0.629607	0.385243	0.312723	0.36688	0.381293	0.374193	0.41957	0.542853	0.58102	0.34894	0.4278	0.391347	0.42635
Ace_Ace 6	1	0.629607	0.385243	0.312723	0.36688	0.381293	0.374193	0.41957	0.542853	0.58102	0.34894	0.4278	0.391347	0.42635
Ace_Ace 7	1	0.533503	0.40792	0.245562	-0.032041	0.128696	0.181099	0.344058	0.287983	0.415055	0.333193	0.0344902	0.265643	0.264226
Ace_Ace 8	1	0.43267	0.39008	0.258205	0.11023	0.397915	0.092741	-0.154425	-0.031365	0.192419	-0.073969	0.044531	0.0195485	0.137865
BUD 1	0.3632	1	0.76181	0.69619	0.3447	0.35451	-0.023152	0.05306	-0.1119	0.26594	0.1471	0.2438	-0.14657	0.34098
BUD 2	0.554913	1	0.318848	0.460827	0.273403	0.337093	0.10767	0.28048	0.262643	0.27274	0.234482	0.318453	0.01171	0.164288
BUD 3	0.37591	1	0.507823	0.467727	0.41273	0.21886	-0.00885	0.332793	0.236273	0.306427	0.025489	0.111077	0.222363	0.171836
BUD 4	0.270807	1	0.502496	0.442803	0.596983	0.362457	0.275343	0.127457	-0.113563	0.254373	0.255772	0.31014	0.130187	0.422587
BUD 5	0.629607	1	0.607453	0.534157	0.478467	0.432557	0.455497	0.379358	0.53242	0.589887	0.383327	0.504557	0.379537	0.38518
BUD 6	0.372778	1	0.43775	0.349607	0.40559	0.22041	0.0855935	0.032737	0.241377	0.224342	0.425685	0.29351	0.326263	0.319244
BUD 7	0.533503	1	0.769887	0.642757	0.20569	0.48041	0.218901	0.271333	0.373733	0.256998	0.227649	0.103663	0.107884	0.357827
BUD 8	0.43267	1	0.59849	0.578875	0.3554	0.38244	0.181628	-0.0568597	0.290905	-0.12243	0.10347	0.26455	0.105506	0.363995
ETA 1	0.57326	0.76181	1	0.81219	0.24239	0.57492	0.013037	0.3505	-0.033847	0.3853	0.37254	0.39109	-0.085178	0.52411
ETA 2	0.39776	0.318848	1	0.490193	0.0772373	0.36713	0.0133587	0.43696	0.0430563	0.258167	0.404003	0.51704	0.0346383	0.464593
ETA 3	0.540337	0.507823	1	0.436259	0.151311	0.281876	0.0254737	0.155464	0.0158227	0.482907	0.217177	0.358842	0.0293733	-0.0181293
ETA 4	0.341764	0.502496	1	0.718243	0.43085	0.261957	0.0611567	0.314793	0.057432	0.231995	0.283127	0.501317	0.0913333	0.30948
ETA 5	0.385243	0.607453	1	0.74792	0.351007	0.34558	0.5258	0.38899	0.31532	0.340193	0.399683	0.662247	0.24176	0.326578
ETA 6	0.42002	0.43775	1	0.69339	0.219585	0.610595	0.35744	-0.02102	0.180549	0.305465	0.296389	0.283215	0.205789	0.109445
ETA 7	0.40792	0.769887	1	0.690753	0.2205	0.575537	0.210147	0.266323	0.265448	0.297724	0.31839	0.136093	0.2036	0.27685
ETA 8	0.39008	0.59849	1	0.858585	0.096019	0.535075	0.373345	-0.051503	0.0436883	-0.013935	-0.0204	0.4393	0.0500815	0.154658
G-BUT 1	0.50488	0.69619	0.81219	1	0.25349	0.56432	-0.0051199	0.28131	-0.094933	0.31614	0.17635	0.21262	-0.27462	0.40609
G-BUT 2	0.25293	0.460827	0.490193	1	0.311527	0.147212	0.207427	0.294623	0.343797	0.319695	0.338992	0.46731	0.153583	0.413787
G-BUT 3	0.189063	0.467727	0.436259	1	0.320714	0.503167	0.0669577	0.240391	0.24046	0.38293	0.182521	0.324008	0.221537	0.223947
G-BUT 4	0.273357	0.442803	0.718243	1	0.441247	0.319071	0.134716	0.490197	0.229407	0.376937	0.562447	0.487437	0.32225	0.514023
G-BUT 5	0.312723	0.534157	0.74792	1	0.410213	0.34997	0.507823	0.4286	0.329197	0.443	0.362287	0.535203	0.310003	0.24283
G-BUT 6	0.325687	0.349607	0.69339	1	0.3366	0.502855	0.40454	0.340448	0.0377723	0.378963	0.334965	0.35038	0.38582	0.194555
G-BUT 7	0.245562	0.642757	0.690753	1	0.217487	0.63037	-0.031255	0.114515	-0.007809	0.127459	0.138452	0.10754	0.038663	-0.054272
G-BUT 8	0.258205	0.578875	0.858585	1	0.139793	0.44171	0.339095	-0.123565	0.129184	-0.201615	0.028225	0.514485	0.18954	0.215491
PAC 1	0.01853	0.3447	0.24239	0.25349	1	0.38734	0.20756	-0.12024	0.10795	0.11991	0.12217	0.0013983	-0.02113	0.18333
PAC 2	0.215675	0.273403	0.0772373	0.311527	1	0.376697	0.370493	0.0533553	0.210983	0.224739	0.291688	0.218801	0.0472073	0.345283
PAC 3	0.147303	0.41273	0.151311	0.320714	1	0.34071	0.270301	0.284909	0.416383	0.243567	0.283393	0.25407	0.268333	0.33341
PAC 4	0.172719	0.596983	0.43085	0.441247	1	0.315199	0.316189	0.264785	0.146529	0.144187	0.391775	0.39454	0.280185	0.555433
PAC 5	0.36688	0.478467	0.351007	0.410213	1	0.614827	0.42194	0.370737	0.505693	0.40945	0.316081	0.254009	0.52725	0.221683
PAC 6	-0.0633993	0.40559	0.219585	0.3366	1	0.103758	-0.08405	0.0466717	-0.01936	-0.000626667	0.0756895	-0.040407	0.340162	0.190687
PAC 7	-0.032041	0.20569	0.2205	0.217487	1	0.509243	0.34516	0.00275533	0.281629	0.0383167	-0.02694	0.0904457	0.249107	0.415647
PAC 8	0.11023	0.3554	0.096019	0.139793	1	0.27328	0.0752334	0.01871	0.214226	0.029497	0.0039455	-0.0991125	0.36961	0.513075
PHA 1	0.30137	0.35451	0.57492	0.56432	0.38734	1	0.0066647	0.11888	0.048656	0.41966	0.24684	0.42594	-0.061684	0.29717
PHA 2	0.515697	0.337093	0.36713	0.147212	0.376697	1	0.30003	0.39453	0.11283	0.5941	0.54435	0.29055	-0.184486	0.121261
PHA 3	0.28412	0.21886	0.281876	0.503167	0.34071	1	0.192513	0.130663	0.376923	0.409468	0.426153	0.398277	0.270595	0.137318
PHA 4	0.46413	0.362457	0.261957	0.319071	0.315199	1	0.426283	0.26241	0.132443	0.613043	0.317254	0.277954	0.118042	0.28352
PHA 5	0.381293	0.432557	0.34558	0.34997	0.614827	1	0.421477	0.250523	0.407927	0.422	0.21248	0.25624	0.264433	0.134837
PHA 6	0.29511	0.22041	0.610595	0.502855	0.103758	1	0.26413	0.04289	0.0811205	0.32079	0.248875	0.389625	-0.0184235	-0.079837
PHA 7	0.128696	0.48041	0.575537	0.63037	0.509243	1	0.117683	0.0768447	0.128051	0.179681	0.0785091	0.0459437	0.185254	0.140301
PHA 8	0.397915	0.38244	0.535075	0.44171	0.27328	1	0.531775	-0.0283106	0.147886	0.23435	-0.19458	0.254372	0.056033	0.27082
VIN 1	0.028015	-0.023152	0.013037	-0.0051199	0.20756	0.0066647	1	0.14016	0.28615	-0.075416	0.30808	0.095692	0.11651	0.064153
VIN 2	0.3606	0.10767	0.0133587	0.207427	0.370493	0.30003	1	-0.0182503	0.323787	0.353437	0.523667	0.0416559	0.056417	-0.123806
VIN 3	0.0192104	-0.00885	0.0254737	0.0669577	0.270301	0.192513	1	0.205441	0.30636	0.272468	0.446637	0.429857	0.124197	0.241678
VIN 4	0.254473	0.275343	0.0611567	0.134716	0.316189	0.426283	1	0.114434	0.0743	0.270947	0.346121	0.326163	0.118853	0.209505
VIN 5	0.374193	0.455497	0.5258	0.507823	0.42194	0.421477	1	0.273243	0.35453	0.43619	0.48743	0.557657	0.419117	0.225161
VIN 6	0.128875	0.0855935	0.35744	0.40454	-0.08405	0.26413	1	0.327363	-0.056263	0.292505	0.35025	0.13186	0.252862	0.259636
VIN 7	0.181099	0.218901	0.210147	-0.031255	0.34516	0.117683	1	0.143674	0.49618	0.101117	0.299967	0.313085	0.362721	0.459007
VIN 8	0.092741	0.181628	0.373345	0.339095	0.0752334	0.531775	1	0.0625995	0.21824	0.205133	0.053571	0.39199	0.25697	0.320665
2001-10-01	0.038031	0.05306	0.3505	0.28131	-0.12024	0.11888	0.14016	1	0.29638	0.30311	0.24174	0.22453	0.04474	0.3408
2002-10-01	0.226877	0.28048	0.43696	0.294623	0.0533553	0.39453	-0.0182503	1	0.32233	0.39913	0.412551	0.43371	0.0998433	0.375317
2003-10-01	0.169669	0.332793	0.155464	0.240391	0.284909	0.130663	0.205441	1	0.529673	0.541153	0.257282	0.293308	0.49646	0.33663
2004-10-01	0.46165	0.127457	0.314793	0.490197	0.264785	0.26241	0.114434	1	0.240642	0.59854	0.56893	0.462203	0.580937	0.465363
2005-10-01	0.41957	0.379358	0.38899	0.4286	0.370737	0.250523	0.273243	1	0.318173	0.47329	0.253163	0.36591	0.27597	0.35086
2006-10-01	0.149628	0.032737	-0.02102	0.340448	0.0466717	0.04289	0.327363	1	0.139982	0.556297	0.240315	0.240835	0.293494	0.199837
2007-10-01	0.344058	0.271333	0.266323	0.114515	0.00275533	0.0768447	0.143674	1	0.41781	0.480217	0.271567	0.208305	0.320377	0.333857
2008-10-01	-0.154425	-0.0568597	-0.051503	-0.123565	0.01871	-0.0283106	0.0625995	1	0.298633	0.132	0.228704	0.0918365	0.070396	0.02325
ACP 1	-0.16704	-0.1119	-0.033847	-0.094933	0.10795	0.048656	0.28615	0.29638	1	0.17114	0.26474	0.059805	0.32372	0.031421
ACP 2	0.184109	0.262643	0.0430563	0.343797	0.210983	0.11283	0.323787	0.32233	1	0.265297	0.157286	0.108191	0.288173	0.0643533
ACP 3	0.169513	0.236273	0.0158227	0.24046	0.416383	0.376923	0.30636	0.529673	1	0.445733	0.357942	0.342387	0.56151	0.305993
ACP 4	-0.0592523	-0.113563	0.057432	0.229407	0.146529	0.132443	0.0743	0.240642	1	0.211043	0.21307	0.22189	0.411597	0.115451
ACP 5	0.542853	0.53242	0.31532	0.329197	0.505693	0.407927	0.35453	0.318173	1	0.619967	0.330053	0.3832	0.452817	0.330603
ACP 6	0.0370187	0.241377	0.180549	0.0377723	-0.01936	0.0811205	-0.056263	0.139982	1	0.142743	0.201117	0.190437	0.0203903	0.102623
ACP 7	0.287983	0.373733	0.265448	-0.007809	0.281629	0.128051	0.49618	0.41781	1	0.225489	0.238425	0.212486	0.329067	0.683717
ACP 8	-0.031365	0.290905	0.0436883	0.129184	0.214226	0.147886	0.21824	0.298633	1	0.182681	0.264615	0.197585	0.290685	0.35627
BEA 1	0.13315	0.26594	0.3853	0.31614	0.11991	0.41966	-0.075416	0.30311	0.17114	1	0.064014	0.49716	0.14652	0.3585
BEA 2	0.355265	0.27274	0.258167	0.319695	0.224739	0.5941	0.353437	0.39913	0.265297	1	0.582847	0.445597	-0.0903827	0.0924933
BEA 3	0.522753	0.306427	0.482907	0.38293	0.243567	0.409468	0.272468	0.541153	0.445733	1	0.494797	0.400793	0.352233	0.225215
BEA 4	0.715753	0.254373	0.231995	0.376937	0.144187	0.613043	0.270947	0.59854	0.211043	1	0.572633	0.349313	0.467473	0.353493
BEA 5	0.58102	0.589887	0.340193	0.443	0.40945	0.422	0.43619	0.47329	0.619967	1	0.310353	0.340213	0.48494	0.208337
BEA 6	0.384553	0.224342	0.305465	0.378963	-0.000626667	0.32079	0.292505	0.556297	0.142743	1	0.29036	0.42851	0.254927	0.185817
BEA 7	0.415055	0.256998	0.297724	0.127459	0.0383167	0.179681	0.101117	0.480217	0.225489	1	0.340197	0.324137	0.309353	0.27279
BEA 8	0.192419	-0.12243	-0.013935	-0.201615	0.029497	0.23435	0.205133	0.132	0.182681	1	-0.0894847	0.109993	-0.06212	0.015255
GEO 1	0.29103	0.1471	0.37254	0.17635	0.12217	0.24684	0.30808	0.24174	0.26474	0.064014	1	0.3216	0.13736	0.28634
GEO 2	0.428677	0.234482	0.404003	0.338992	0.291688	0.54435	0.523667	0.412551	0.157286	0.582847	1	0.512383	0.0382753	0.207997
GEO 3	0.218487	0.025489	0.217177	0.182521	0.283393	0.426153	0.446637	0.257282	0.357942	0.494797	1	0.645583	0.0570233	0.198293
GEO 4	0.358337	0.255772	0.283127	0.562447	0.391775	0.317254	0.346121	0.56893	0.21307	0.572633	1	0.457887	0.560933	0.64046
GEO 5	0.34894	0.383327	0.399683	0.362287	0.316081	0.21248	0.48743	0.253163	0.330053	0.310353	1	0.60467	0.558467	0.367418
GEO 6	0.181747	0.425685	0.296389	0.334965	0.0756895	0.248875	0.35025	0.240315	0.201117	0.29036	1	0.47995	0.38181	0.4983
GEO 7	0.333193	0.227649	0.31839	0.138452	-0.02694	0.0785091	0.299967	0.271567	0.238425	0.340197	1	0.178999	0.363791	0.129301
GEO 8	-0.073969	0.10347	-0.0204	0.028225	0.0039455	-0.19458	0.053571	0.228704	0.264615	-0.0894847	1	0.264985	0.222965	-0.0940305
LINA 1	0.23738	0.2438	0.39109	0.21262	0.0013983	0.42594	0.095692	0.22453	0.059805	0.49716	0.3216	1	0.20634	0.37801
LINA 2	0.236087	0.318453	0.51704	0.46731	0.218801	0.29055	0.0416559	0.43371	0.108191	0.445597	0.512383	1	-0.150097	0.383999
LINA 3	0.155495	0.111077	0.358842	0.324008	0.25407	0.398277	0.429857	0.293308	0.342387	0.400793	0.645583	1	0.116133	0.187512
LINA 4	0.279797	0.31014	0.501317	0.487437	0.39454	0.277954	0.326163	0.462203	0.22189	0.349313	0.457887	1	0.367913	0.377916
LINA 5	0.4278	0.504557	0.662247	0.535203	0.254009	0.25624	0.557657	0.36591	0.3832	0.340213	0.60467	1	0.420333	0.37755
LINA 6	0.353125	0.29351	0.283215	0.35038	-0.040407	0.389625	0.13186	0.240835	0.190437	0.42851	0.47995	1	0.0650852	0.0867915
LINA 7	0.0344902	0.103663	0.136093	0.10754	0.0904457	0.0459437	0.313085	0.208305	0.212486	0.324137	0.178999	1	0.0863633	0.0896663
LINA 8	0.044531	0.26455	0.4393	0.514485	-0.0991125	0.254372	0.39199	0.0918365	0.197585	0.109993	0.264985	1	0.239732	0.176599
MSC 1	-0.21562	-0.14657	-0.085178	-0.27462	-0.02113	-0.061684	0.11651	0.04474	0.32372	0.14652	0.13736	0.20634	1	0.066774
MSC 2	-0.0624333	0.01171	0.0346383	0.153583	0.0472073	-0.184486	0.056417	0.0998433	0.288173	-0.0903827	0.0382753	-0.150097	1	0.295483
MSC 3	0.082055	0.222363	0.0293733	0.221537	0.268333	0.270595	0.124197	0.49646	0.56151	0.352233	0.0570233	0.116133	1	0.272496
MSC 4	0.212765	0.130187	0.0913333	0.32225	0.280185	0.118042	0.118853	0.580937	0.411597	0.467473	0.560933	0.367913	1	0.457903
MSC 5	0.391347	0.379537	0.24176	0.310003	0.52725	0.264433	0.419117	0.27597	0.452817	0.48494	0.558467	0.420333	1	0.266602
MSC 6	0.164713	0.326263	0.205789	0.38582	0.340162	-0.0184235	0.252862	0.293494	0.0203903	0.254927	0.38181	0.0650852	1	0.366597
MSC 7	0.265643	0.107884	0.2036	0.038663	0.249107	0.185254	0.362721	0.320377	0.329067	0.309353	0.363791	0.0863633	1	0.338254
MSC 8	0.0195485	0.105506	0.0500815	0.18954	0.36961	0.056033	0.25697	0.070396	0.290685	-0.06212	0.222965	0.239732	1	0.475435
cVA 1	0.23339	0.34098	0.52411	0.40609	0.18333	0.29717	0.064153	0.3408	0.031421	0.3585	0.28634	0.37801	0.066774	1
cVA 2	0.08592	0.164288	0.464593	0.413787	0.345283	0.121261	-0.123806	0.375317	0.0643533	0.0924933	0.207997	0.383999	0.295483	1
cVA 3	-0.0696273	0.171836	-0.0181293	0.223947	0.33341	0.137318	0.241678	0.33663	0.305993	0.225215	0.198293	0.187512	0.272496	1
cVA 4	0.129248	0.422587	0.30948	0.514023	0.555433	0.28352	0.209505	0.465363	0.115451	0.353493	0.64046	0.377916	0.457903	1
cVA 5	0.42635	0.38518	0.326578	0.24283	0.221683	0.134837	0.225161	0.35086	0.330603	0.208337	0.367418	0.37755	0.266602	1
cVA 6	0.0585483	0.319244	0.109445	0.194555	0.190687	-0.079837	0.259636	0.199837	0.102623	0.185817	0.4983	0.0867915	0.366597	1
cVA 7	0.264226	0.357827	0.27685	-0.054272	0.415647	0.140301	0.459007	0.333857	0.683717	0.27279	0.129301	0.0896663	0.338254	1
cVA 8	0.137865	0.363995	0.154658	0.215491	0.513075	0.27082	0.320665	0.02325	0.35627	0.015255	-0.0940305	0.176599	0.475435	1
