# Supplementary material for: Higher-order olfactory neurons in the lateral horn support odor valence and odor identity coding in Drosophila
Source: eLife. 2022 May 27;11:e74637. doi: 10.7554/eLife.74637 (PMC9142144; doi:10.7554/eLife.74637)
Supplement: Figure 3—source data 1. [file elife-74637-fig3-data1.xlsx]

## Sheet: A
Lower plane		Average Corr Coef across odor
		Ace_Ace	BUD	ETA	G-BUT	PAC	PHA	VIN	2018-10-01	ACP	BEA	GEO	LINA	MSC	cVA	LIM
	Ace_Ace		0.741755	0.799365	0.343595	0.697575	0.456545	0.61853	0.37252	0.68188	0.461115	0.61529	0.587165	0.435495	0.611955
	BUD	0.741755		0.766035	0.408475	0.817822	0.54396	0.67919	0.413845	0.721297	0.568093	0.780395	0.722938	0.378665	0.763987
	ETA	0.799365	0.766035		0.393665	0.66317	0.504705	0.780595	0.345155	0.6548	0.47127	0.622315	0.553515	0.475055	0.6429
	G-BUT	0.343595	0.408475	0.393665		0.33344	0.525735	0.287365	0.506535	0.478695	0.45819	0.60629	0.4618	0.38055	0.493085
	PAC	0.697575	0.817822	0.66317	0.33344		0.55966	0.693615	0.281645	0.710407	0.485648	0.637937	0.572123	0.253995	0.722417									within				across
	PHA	0.456545	0.54396	0.504705	0.525735	0.55966		0.48772	0.578015	0.681695	0.5546	0.5933	0.548345	0.48367	0.483905						within valence	across valence		STDEV	SEM			STDEV	SEM
	VIN	0.61853	0.67919	0.780595	0.287365	0.693615	0.48772		0.273475	0.69207	0.312795	0.536325	0.529655	0.300165	0.70229				lower plane		0.604449	0.518541		0.191687	0.0319478			0.135942	0.022657
	2018-10-01	0.37252	0.413845	0.345155	0.506535	0.281645	0.578015	0.273475		0.63933	0.55138	0.608315	0.618745	0.553495	0.479185				middle plane		0.585785	0.552288		0.210366	0.0350609			0.195855	0.0302212
	ACP	0.68188	0.721297	0.6548	0.478695	0.710407	0.681695	0.69207	0.63933		0.716082	0.709755	0.74343	0.603465	0.732525				upper plane		0.478729	0.40456		0.130455	0.0217425			0.139929	0.0233214
	BEA	0.461115	0.568093	0.47127	0.45819	0.485648	0.5546	0.312795	0.55138	0.716082		0.71168	0.700613	0.760655	0.705592
	GEO	0.61529	0.780395	0.622315	0.60629	0.637937	0.5933	0.536325	0.608315	0.709755	0.71168		0.780428	0.510245	0.718583
	LINA	0.587165	0.722938	0.553515	0.4618	0.572123	0.548345	0.529655	0.618745	0.74343	0.700613	0.780428		0.450035	0.755127
	MSC	0.435495	0.378665	0.475055	0.38055	0.253995	0.48367	0.300165	0.553495	0.603465	0.760655	0.510245	0.450035		0.525475
	cVA	0.611955	0.763987	0.6429	0.493085	0.722417	0.483905	0.70229	0.479185	0.732525	0.705592	0.718583	0.755127	0.525475
Middle plane		Ace_Ace	BUD	ETA	G-BUT	PAC	PHA	VIN	43374	ACP	BEA	GEO	LINA	MSC	cVA
	Ace_Ace		0.69577	0.6963	0.35537	0.37415	0.60266	0.84731	0.81969	0.69904	0.70723	0.2907	0.78318	0.71671	0.76668
	BUD	0.69577		0.72485	0.34807	0.69154	0.68898	0.61314	0.62273	0.73606	0.703395	0.62207	0.76212	0.66378	0.77124
	ETA	0.6963	0.72485		0.62287	0.43134	0.50204	0.61533	0.48839	0.66882	0.60986	0.33618	0.74979	0.67745	0.77156
	G-BUT	0.35537	0.34807	0.62287		0.23248	0.25974	0.38214	0.18081	0.34941	0.29223	0.14154	0.25358	0.38217	0.54118
	PAC	0.37415	0.69154	0.43134	0.23248		0.59934	0.4846	0.20069	0.590895	0.41863	0.418202	0.360485	0.35363	0.54314
	PHA	0.60266	0.68898	0.50204	0.25974	0.59934		0.71989	0.65523	0.76997	0.73515	0.37243	0.64911	0.52422	0.58045
	VIN	0.84731	0.61314	0.61533	0.38214	0.4846	0.71989		0.64112	0.73732	0.68014	0.37396	0.77446	0.68352	0.72882
	43374	0.81969	0.62273	0.48839	0.18081	0.20069	0.65523	0.64112		0.8055	0.77835	0.17094	0.70767	0.73688	0.66707
	ACP	0.69904	0.73606	0.66882	0.34941	0.590895	0.76997	0.73732	0.8055		0.797955	0.509437	0.7866	0.7963	0.72496
	BEA	0.70723	0.703395	0.60986	0.29223	0.41863	0.73515	0.68014	0.77835	0.797955		0.417967	0.80672	0.79857	0.77694
	GEO	0.2907	0.62207	0.33618	0.14154	0.418202	0.37243	0.37396	0.17094	0.509437	0.417967		0.522663	0.06574	0.59668
	LINA	0.78318	0.76212	0.74979	0.25358	0.360485	0.64911	0.77446	0.70767	0.7866	0.80672	0.522663		0.89907	0.84689
	MSC	0.71671	0.66378	0.67745	0.38217	0.35363	0.52422	0.68352	0.73688	0.7963	0.79857	0.06574	0.89907		0.71191
	cVA	0.76668	0.77124	0.77156	0.54118	0.54314	0.58045	0.72882	0.66707	0.72496	0.77694	0.59668	0.84689	0.71191
Upper plane		Ace_Ace	BUD	ETA	G-BUT	PAC	PHA	VIN	43374	ACP	BEA	GEO	LINA	MSC	cVA
	Ace_Ace		0.74675	0.68788	0.36779	0.41059	0.52797	0.65753	0.16211	0.35352	0.37941	0.42944	0.47929	0.50139	0.47697
	BUD	0.74675		0.58315	0.46955	0.54267	0.62773	0.65639	0.34434	0.519075	0.479865	0.563275	0.73433	0.50442	0.663615
	ETA	0.68788	0.58315		0.54284	0.3059	0.41514	0.65865	0.0062821	0.43548	0.28498	0.49309	0.52874	0.59513	0.46599
	G-BUT	0.36779	0.46955	0.54284		0.24409	0.4644	0.34216	0.3983	0.15416	0.29565	0.34411	0.43801	0.52084	0.41715
	PAC	0.41059	0.54267	0.3059	0.24409		0.58073	0.34524	0.23408	0.486175	0.45336	0.442765	0.45029	0.25231	0.49003
	PHA	0.52797	0.62773	0.41514	0.4644	0.58073		0.56226	0.37333	0.51717	0.25927	0.46174	0.5346	0.31616	0.36284
	VIN	0.65753	0.65639	0.65865	0.34216	0.34524	0.56226		0.14346	0.45447	0.29109	0.44956	0.54217	0.38429	0.59822
	43374	0.16211	0.34434	0.0062821	0.3983	0.23408	0.37333	0.14346		0.50061	0.31012	0.18202	0.4083	0.42048	0.37344
	ACP	0.35352	0.519075	0.43548	0.15416	0.486175	0.51717	0.45447	0.50061		0.577865	0.52829	0.459735	0.37303	0.52449
	BEA	0.37941	0.479865	0.28498	0.29565	0.45336	0.25927	0.29109	0.31012	0.577865		0.40928	0.54484	0.39172	0.49231
	GEO	0.42944	0.563275	0.49309	0.34411	0.442765	0.46174	0.44956	0.18202	0.52829	0.40928		0.48992	0.34649	0.57102
	LINA	0.47929	0.73433	0.52874	0.43801	0.45029	0.5346	0.54217	0.4083	0.459735	0.54484	0.48992		0.55215	0.658005
	MSC	0.50139	0.50442	0.59513	0.52084	0.25231	0.31616	0.38429	0.42048	0.37303	0.39172	0.34649	0.55215		0.38835
	cVA	0.47697	0.663615	0.46599	0.41715	0.49003	0.36284	0.59822	0.37344	0.52449	0.49231	0.57102	0.658005	0.38835

## Sheet: B, C, E, F
					Ace_Ace	BUD	ETA	G-BUT	PAC	PHA	VIN	2019-10-01	ACP	BEA	GEO	LINA	MSC	cVA
LHN Corr Coeff		average of all planes		Ace_Ace	1	0.728092	0.727848	0.355585	0.494105	0.529058	0.70779	0.45144	0.578147	0.515918	0.445143	0.616545	0.551198	0.618535			average delta F/F for LHN response
				BUD	0.728092	1	0.691345	0.408698	0.684011	0.620223	0.649573	0.460305	0.658811	0.583784	0.655247	0.739796	0.515622	0.732947				Ace_Ace	BUD	ETA	G-BUT	PAC	PHA	VIN	2019-10-01	ACP	BEA	GEO	LINA	MSC	cVA	LIM
				ETA	0.727848	0.691345	1	0.519792	0.466803	0.473962	0.684858	0.279942	0.586367	0.45537	0.483862	0.610682	0.582545	0.626817			lower plane	0.208738	0.397082	0.240573	0.0874155	0.383566	0.308925	0.218227	0.216969	0.093804	-0.00589035	0.270808	0.220427	0.0378273	0.0787755	-0.000273443
				G-BUT	0.355585	0.408698	0.519792	1	0.270003	0.416625	0.337222	0.361882	0.327422	0.34869	0.36398	0.384463	0.427853	0.483805			middle plane	0.829949	0.94946	0.824764	0.256707	0.698509	0.534411	0.574712	0.566601	0.453001	0.261118	0.283601	0.611366	0.355142	0.290803	0.236219
				PAC	0.494105	0.684011	0.466803	0.270003	1	0.57991	0.507818	0.238805	0.595826	0.452546	0.499635	0.460966	0.286645	0.585196			upper plane	0.529323	1.05847	0.842003	0.241773	0.74534	0.453147	0.557381	0.265415	0.282355	0.135877	0.420857	0.398968	0.181882	0.263989	0.197726
				PHA	0.529058	0.620223	0.473962	0.416625	0.57991	1	0.589957	0.535525	0.656278	0.51634	0.475823	0.577352	0.44135	0.475732
				VIN	0.70779	0.649573	0.684858	0.337222	0.507818	0.589957	1	0.352685	0.627953	0.428008	0.453282	0.615428	0.455992	0.676443
				43374	0.45144	0.460305	0.279942	0.361882	0.238805	0.535525	0.352685	1	0.64848	0.546617	0.320425	0.578238	0.570285	0.506565
				ACP	0.578147	0.658811	0.586367	0.327422	0.595826	0.656278	0.627953	0.64848	1	0.697301	0.582494	0.663255	0.590932	0.660658
				BEA	0.515918	0.583784	0.45537	0.34869	0.452546	0.51634	0.428008	0.546617	0.697301	1	0.512976	0.684058	0.650315	0.658281
				GEO	0.445143	0.655247	0.483862	0.36398	0.499635	0.475823	0.453282	0.320425	0.582494	0.512976	1	0.59767	0.307492	0.628761
				LINA	0.616545	0.739796	0.610682	0.384463	0.460966	0.577352	0.615428	0.578238	0.663255	0.684058	0.59767	1	0.633752	0.753341
				MSC	0.551198	0.515622	0.582545	0.427853	0.286645	0.44135	0.455992	0.570285	0.590932	0.650315	0.307492	0.633752	1	0.541912
				cVA	0.618535	0.732947	0.626817	0.483805	0.585196	0.475732	0.676443	0.506565	0.660658	0.658281	0.628761	0.753341	0.541912	1
					Ace_Ace	BUD	ETA	G-BUT	PAC	PHA	VIN	2019-10-01	ACP	BEA	GEO	LINA	MSC	cVA
PN Corr Coeff		average of all planes		Ace_Ace	1	0.441674	0.432048	0.295301	0.116987	0.346041	0.179901	0.206882	0.120478	0.412496	0.260805	0.221088	0.107252	0.15824			averagedeltaF/F for PN response
				BUD	0.441674	1	0.56307	0.521618	0.38412	0.348592	0.161579	0.177545	0.213986	0.256035	0.225372	0.268719	0.14211	0.315742				Ace Ace	BUD	ETA	G-BUT	PAC	PHA	VIN	43374	ACP	BEA	GEO	LINA	MSC	cVA
				ETA	0.432048	0.56307	1	0.680942	0.223612	0.444084	0.19747	0.230064	0.110934	0.285977	0.283864	0.411143	0.0964247	0.268448			lower plane	0.0987678	0.000679123	0.0671321	0.0367764	0.0120868	0.0971917	0.00896556	0.0232836	0.0389581	0.075642	0.00398018	0.0238519	0.0391853	0.0611182
				G-BUT	0.295301	0.521618	0.680942	1	0.303884	0.432334	0.203023	0.258315	0.150884	0.267939	0.26553	0.374873	0.168347	0.269556			middle plane	0.27456	0.133937	0.256268	0.123772	0.15414	0.300506	0.0288737	0.0509245	0.0164569	0.188933	0.0255072	0.00323854	0.01591	0.0179807
				PAC	0.116987	0.38412	0.223612	0.303884	1	0.365132	0.240353	0.11521	0.233004	0.15113	0.182225	0.134218	0.257591	0.344819			upper plane	0.217674	0.134647	0.36216	0.1371	0.221633	0.342195	0.0432063	0.0130614	0.0394788	0.200138	0.063979	0.101022	0.0164733	0.0134254
				PHA	0.346041	0.348592	0.444084	0.432334	0.365132	1	0.282569	0.156054	0.17948	0.399137	0.234985	0.292363	0.0787206	0.163174
				VIN	0.179901	0.161579	0.19747	0.203023	0.240353	0.282569	1	0.156083	0.25041	0.232047	0.351965	0.285995	0.213456	0.207
				43739	0.206882	0.177545	0.230064	0.258315	0.11521	0.156054	0.156083	1	0.320453	0.435467	0.309281	0.29008	0.272777	0.303239
				ACP	0.120478	0.213986	0.110934	0.150884	0.233004	0.17948	0.25041	0.320453	1	0.283012	0.253406	0.214498	0.334745	0.248804
				BEA	0.412496	0.256035	0.285977	0.267939	0.15113	0.399137	0.232047	0.435467	0.283012	1	0.320714	0.361965	0.232868	0.213987
				GEO	0.260805	0.225372	0.283864	0.26553	0.182225	0.234985	0.351965	0.309281	0.253406	0.320714	1	0.433257	0.290078	0.27926
				LINA	0.221088	0.268719	0.411143	0.374873	0.134218	0.292363	0.285995	0.29008	0.214498	0.361965	0.433257	1	0.168975	0.257255
				MSC	0.107252	0.14211	0.0964247	0.168347	0.257591	0.0787206	0.213456	0.272777	0.334745	0.232868	0.290078	0.168975	1	0.317443
				cVA	0.15824	0.315742	0.268448	0.269556	0.344819	0.163174	0.207	0.303239	0.248804	0.213987	0.27926	0.257255	0.317443	1

## Sheet: G, H, I, J, K
		Ace Ace	BUD	ETA	G-BUT	PAC	PHA	VIN	43374	ACP	BEA	GEO	LINA	MSC
	PN response	0.203512	0.0942875	0.242002	0.0806447	0.134548	0.260198	0.0236475	0.0163159	-0.0186076	0.1591	0.0308855	0.027302	-0.011209						LHN response	no. of activated OR
	T maze data	0.138333	0.171111	0.108	0.129825	0.15	0.123333	0.0982456	-0.110145	-0.138333	-0.226316	-0.12807	-0.142105	-0.0833333					BUD	0.801669	53
																			ETA	0.63578	51
																			G-BUT	0.195298	21
																			PAC	0.609138	43
		PN response	T maze																PHA	0.432161	34
	PN response		0.12752	p value															43739	0.349662	27
	T maze	0.44505																	ACP	0.276387	36
		r value																	BEA	0.130368	55
	spearman rank correlation																		GEO	0.325089	1
																			LINA	0.410254	26
																			MSC	0.191617	39
																			ace ace	0.52267	3
																			spearman rank correlation
																				p= 0.6832
																				LHN response	OR response
																			BUD	0.801669	7.421
		Ace_Ace	BUD	ETA	G-BUT	PAC	PHA	VIN	43739	ACP	BEA	GEO	LINA	MSC					ETA	0.63578	5.79
	LHN response	0.52267	0.801669	0.63578	0.195298	0.609138	0.432161	0.450107	0.349662	0.276387	0.130368	0.325089	0.410254	0.191617					G-BUT	0.195298	1.401
	T maze data	0.138333	0.171111	0.108	0.129825	0.15	0.123333	0.0982456	-0.110145	-0.138333	-0.226316	-0.12807	-0.142105	-0.0833333					PAC	0.609138	4.865
																			PHA	0.432161	3.361
																			43739	0.349662	2.691
Spearman Rank Correlation																			ACP	0.276387	5.663
	r= 0.68132																		BEA	0.130368	6.757
	p= 0.01034																		GEO	0.325089	0.493
																			LINA	0.410254	2.671
																			MSC	0.191617	2.78
																			ace ace	0.52267	-0.09
																			spearman rank correlation
																				p= 0.356
																				PN response	LHN response
																			Ace Ace	0.203512	0.52267
																			BUD	0.0942875	0.801669
																			ETA	0.242002	0.63578
																			G-BUT	0.0806447	0.195298
																			PAC	0.134548	0.609138
																			PHA	0.260198	0.432161
																			VIN	0.0236475	0.450107
																			2018-10-01	0.0163159	0.349662
																			ACP	-0.0186076	0.276387
																			BEA	0.1591	0.130368
																			GEO	0.0308855	0.325089
																			LINA	0.027302	0.410254
																			MSC	-0.011209	0.191617
																			spearman rank correlation
																				p= 0.12233
