# Supplementary material for: Higher-order olfactory neurons in the lateral horn support odor valence and odor identity coding in Drosophila
Source: eLife. 2022 May 27;11:e74637. doi: 10.7554/eLife.74637 (PMC9142144; doi:10.7554/eLife.74637)
Supplement: Figure 5—figure supplement 1—source data 1. [file elife-74637-fig5-figsupp1-data1.xlsx]

## Sheet: Sheet1
				after mACT transection							after iACT transection
				BEA other hem							BEA other hem
				before LA	after LA						before LA	after LA
				0.400373	0.608075						0.500349	-0.047879
				0.438948	0.460212						0.63902	0.0585539
				0.534165	0.53115						0.690382	-0.0229266
				0.683549	0.723546						0.385795	-0.0908979
				0.264473	0.518158						0.217106	0.0486177
											0.593606	-0.108355
			average	0.464302	0.568228						0.665414	0.225765
											0.64	0.056
										average	0.541459	0.0148598
