# Supplementary material for: Higher-order olfactory neurons in the lateral horn support odor valence and odor identity coding in Drosophila
Source: eLife. 2022 May 27;11:e74637. doi: 10.7554/eLife.74637 (PMC9142144; doi:10.7554/eLife.74637)
Supplement: Figure 5—source data 1. [file elife-74637-fig5-data1.xlsx]

## Sheet: mACT transection
	After mACT transection
			BEA and VIN used at 10-2 conc. for all laser ablation experiments
			lower plane				middle plane				upper plane
		BEA before LA	BEA after LA	VIN before LA	VIN after LA	BEA before LA	BEA after LA	VIN before LA	VIN after LA	BEA before LA	BEA after LA	VIN before LA	VIN after LA
		-0.0926183	-0.101392	-0.00715733	-0.0660225	0.099537	0.15673	0.0680954	0.125183	0.186776	0.456238	0.216715	0.428466
		0.199246	0.141444	0.0543585	0.0782544	0.542599	0.446125	0.25478	0.339684	0.608043	0.590109	0.47689	0.649143
		0.729157	0.575289	0.375439	0.429664	0.951966	0.96162	0.394407	0.46999	1.01401	1.01057	0.805384	0.978153
		0.966289	1.14421	0.669683	0.728623	0.911868	0.998371	0.767232	1.01819	0.943583	0.927784	0.85171	0.811511
		0.564598	0.40507			0.636875	0.693165			0.740872	0.702404
		0.373071	0.310898	0.278776	0.23893	0.690716	0.747975	0.459852	0.624401	0.78411	0.751062	0.432025	0.685059
		0.277513	0.274679	0.149013	0.192731	0.392613	0.487988	0.326431	0.495986	0.476602	0.588499	0.463131	0.491601
		0.2088	0.388935	0.185542	0.223956	0.485379	0.596503	0.446329	0.610078	0.558824	0.805292	0.482185	0.676479
		0.417037	0.472403	0.316067	0.420067	0.600444	0.648664	0.490847	0.65573	0.667765	0.736177	0.586732	0.743285
		0.236484	0.342926	0.102631	0.0658576	0.400116	0.393783	0.475503	0.667778	0.401476	0.400286	0.395054	0.576783
		0.431324	0.447606	0.41442	0.542871	0.568441	0.719929	0.419563	0.86511	0.478746	0.62954	0.533494	0.844234
		0.203127	0.25047	0.0393313	0.0791776	0.311521	0.486527	0.240358	0.466134	0.292699	0.447064	0.444393	0.508546
	Average	0.376169	0.387711	0.234373	0.266737	0.54934	0.611448	0.394854	0.576206	0.596126	0.670419	0.517065	0.672115
	TTEST		0.725789		0.0961348		0.0127289		0.000214967		0.0397743		0.000475245
			VIN lower plane						VIN middle plane						VIN upper plane
			BEA lower plane						BEA middle plane						BEA upper plane

## Sheet: iACT transection
After iACT transection
			lower plane				middle plane				upper plane
			BEA before LA	BEA after LA	VIN before LA	VIN after LA	BEA before LA	BEA after LA	VIN before LA	VIN after LA	BEA before LA	BEA after LA	VIN before LA	VIN after LA
			0.118221	-0.0090379	0.141608	-0.0148487	0.555056	-0.0225592	0.309337	-0.0236179	0.651113	-0.0410853	0.500349	-0.047879
			0.585625	0.00114264	0.66921	0.0233048	0.971332	0.0185814	0.858604	0.00546943	0.703287	0.0301545	0.63902	0.0585539
			0.800078	0.0318232	0.328407	-0.0191996	0.842675	0.263085	0.628027	-0.0250105	0.931253	0.251102	0.690382	-0.0229266
			0.399001	-0.0554651	0.172336	-0.0841893	0.538177	-0.0761966	0.489771	-0.064157	0.694721	-0.0598473	0.385795	-0.0908979
			0.572378	0.0659051	0.109632	-0.0135439	0.660974	0.314737	0.284394	0.0370233	0.81629	0.246732	0.217106	0.0486177
			0.198452	-0.0787459	0.169436	-0.080256	0.622067	-0.0862667	0.673513	-0.0911036	0.622849	-0.10671	0.593606	-0.108355
			0.427855	0.208596	0.277092	0.281767	0.688873	0.210002	0.720138	0.232789	0.93249	0.24335	0.665414	0.225765
		average	0.443087	0.0234597	0.266817	0.0132907	0.697022	0.0887689	0.566255	0.0101989	0.764572	0.0805279	0.527382	0.00898258
ttest			0.00261098		0.0175131		0.000146672		0.00054483		7.40514e-08		0.000315643
		median	0.427855	0.00114264	0.172336	-0.0148487	0.660974	0.0185814	0.628027	-0.0236179	0.703287	0.0301545	0.593606	-0.0229266
