# Supplementary material for: Higher-order olfactory neurons in the lateral horn support odor valence and odor identity coding in Drosophila
Source: eLife. 2022 May 27;11:e74637. doi: 10.7554/eLife.74637 (PMC9142144; doi:10.7554/eLife.74637)
Supplement: Figure 6—source data 1. [file elife-74637-fig6-data1.xlsx]

## Sheet: B
						Upper plane														middle plane
	dates
	3.7a	0	BEA_upper_plane_1	BEA_upper_plane_2	BEA_upper_plane_after_LA			0	VIN_upper_plane_1	VIN_upper_plane_2	VIN_upper_plane_after_LA				0	BEA_middle_plane_1	BEA_middle_plane_2	BEA_middle_plane_after_LA				0	VIN_middle_plane_1	VIN_middle_plane_2	VIN_middle_plane_after_LA
		BEA_upper_plane_1	1	0.9842	0.85047			VIN_upper_plane_1	1	0.94663	0.81899				BEA_middle_plane_1	1	0.98316	0.92937				VIN_middle_plane_1	1	0.97254	0.92081
		BEA_upper_plane_2	0.9842	1	0.85895			VIN_upper_plane_2	0.94663	1	0.81889				BEA_middle_plane_2	0.98316	1	0.90561				VIN_middle_plane_2	0.97254	1	0.88703
		BEA_upper_plane_after_LA	0.85047	0.85895	1			VIN_upper_plane_after_LA	0.81899	0.81889	1				BEA_middle_plane_after_LA	0.92937	0.90561	1				VIN_middle_plane_after_LA	0.92081	0.88703	1
	3.7 b	0	BEA_upper_plane_1	BEA_upper_plane_2	BEA_upper_plane_after_LA			0	VIN_upper_plane_1	VIN_upper_plane_2	VIN_upper_plane_after_LA				0	BEA_middle_plane_1	BEA_middle_plane_2	BEA_middle_plane_after_LA				0	VIN_middle_plane_1	VIN_middle_plane_2	VIN_middle_plane_after_LA
		BEA_upper_plane_1	1	0.81537	0.86539			VIN_upper_plane_1	1	0.83541	0.72893				BEA_middle_plane_1	1	0.97351	0.87305				VIN_upper_plane_1	1	0.94663	0.81899
		BEA_upper_plane_2	0.81537	1	0.69774			VIN_upper_plane_2	0.83541	1	0.61036				BEA_middle_plane_2	0.97351	1	0.8795				VIN_upper_plane_2	0.94663	1	0.81889
		BEA_upper_plane_after_LA	0.86539	0.69774	1			VIN_upper_plane_after_LA	0.72893	0.61036	1				BEA_middle_plane_after_LA	0.87305	0.8795	1				VIN_upper_plane_after_LA	0.81899	0.81889	1
	4.7a	0	BEA_upper_plane_1	BEA_upper_plane_2	BEA_upper_plane_after_LA			0	VIN_upper_plane_1	VIN_upper_plane_2	VIN_upper_plane_after_LA				0	BEA_middle_plane_1	BEA_middle_plane_2	BEA_middle_plane_after_LA				0	VIN_middle_plane_1	VIN_middle_plane_2	VIN_middle_plane_after_LA
		BEA_upper_plane_1	1	0.96062	0.87157			VIN_upper_plane_1	1	0.95485	0.71362				BEA_upper_plane_1	1	0.89949	0.9047				VIN_upper_plane_1	1	0.86151	0.79255
		BEA_upper_plane_2	0.96062	1	0.7986			VIN_upper_plane_2	0.95485	1	0.67411				BEA_upper_plane_2	0.89949	1	0.83947				VIN_upper_plane_2	0.86151	1	0.81697
		BEA_upper_plane_after_LA	0.87157	0.7986	1			VIN_upper_plane_after_LA	0.71362	0.67411	1				BEA_upper_plane_after_LA	0.9047	0.83947	1				VIN_upper_plane_after_LA	0.79255	0.81697	1
	29.6 a														0	BEA_middle_plane_1	BEA_middle_plane_2	BEA_middle_plane_after_LA				0	VIN_middle_plane_1	VIN_middle_plane_2	VIN_middle_plane_after_LA
															BEA_upper_plane_1	1	0.87875	0.86794				VIN_middle_plane_1	1	0.85197	0.90466
															BEA_upper_plane_2	0.87875	1	0.86974				VIN_middle_plane_2	0.85197	1	0.80033
															BEA_upper_plane_after_LA	0.86794	0.86974	1				VIN_middle_plane_after_LA	0.90466	0.80033	1
	29.6 b	0	BEA_upper_plane_1	BEA_upper_plane_2	BEA_upper_plane_after_LA			0	VIN_upper_plane_1	VIN_upper_plane_2	VIN_upper_plane_after_LA				0	BEA_middle_plane_1	BEA_middle_plane_2	BEA_middle_plane_after_LA				0	VIN_middle_plane_1	VIN_middle_plane_2	VIN_middle_plane_after_LA
		BEA_upper_plane_1	1	0.93675	0.96551			VIN_upper_plane_1	1	0.98046	0.9468				BEA_middle_plane_1	1	0.94611	0.92886				VIN_middle_plane_1	1	0.95413	0.73123
		BEA_upper_plane_2	0.93675	1	0.94634			VIN_upper_plane_2	0.98046	1	0.94538				BEA_middle_plane_2	0.94611	1	0.91071				VIN_middle_plane_2	0.95413	1	0.80184
		BEA_upper_plane_after_LA	0.96551	0.94634	1			VIN_upper_plane_after_LA	0.9468	0.94538	1				BEA_middle_plane_after_LA	0.92886	0.91071	1				VIN_middle_plane_after_LA	0.73123	0.80184	1
		0	BEA_upper_plane_1	BEA_upper_plane_2	BEA_upper_plane_after_LA			0	VIN_upper_plane_1	VIN_upper_plane_2	VIN_upper_plane_after_LA				0	BEA_middle_plane_1	BEA_middle_plane_2	BEA_middle_plane_after_LA				0	VIN_middle_plane_1	VIN_middle_plane_2	VIN_middle_plane_after_LA
		BEA_upper_plane_1	1	0.94339	0.884			VIN_upper_plane_1	1	0.70197	0.65596				BEA_middle_plane_1	1	0.94441	0.9403				VIN_middle_plane_1	1	0.93678	0.85509
		BEA_upper_plane_2	0.94339	1	0.91526			VIN_upper_plane_2	0.70197	1	0.76643				BEA_middle_plane_2	0.94441	1	0.95219				VIN_middle_plane_2	0.93678	1	0.84805
		BEA_upper_plane_after_LA	0.884	0.91526	1			VIN_upper_plane_after_LA	0.65596	0.76643	1				BEA_middle_plane_after_LA	0.9403	0.95219	1				VIN_middle_plane_after_LA	0.85509	0.84805	1
	8.10 b	0	BEA_middle_plane_1	BEA_middle_plane_2	BEA_middle_plane_after_LA			0	VIN_middle_plane_1	VIN_middle_plane_2	VIN_middle_plane_after_LA				0	BEA_middle_plane_1	BEA_middle_plane_2	BEA_middle_plane_after_LA				0	VIN_middle_plane_1	VIN_middle_plane_2	VIN_middle_plane_after_LA
		BEA_middle_plane_1	1	0.85182	0.83547			VIN_middle_plane_1	1	0.94143	0.91405				BEA_middle_plane_1	1	0.93341	0.70685				VIN_middle_plane_1	1	0.98088	0.88271
		BEA_middle_plane_2	0.85182	1	0.957			VIN_middle_plane_2	0.94143	1	0.89731				BEA_middle_plane_2	0.93341	1	0.61904				VIN_middle_plane_2	0.98088	1	0.90693
		BEA_middle_plane_after_LA	0.83547	0.957	1			VIN_middle_plane_after_LA	0.91405	0.89731	1				BEA_middle_plane_after_LA	0.70685	0.61904	1				VIN_middle_plane_after_LA	0.88271	0.90693	1
															0	BEA_middle_plane_1	BEA_middle_plane_2	BEA_middle_plane_after_LA				0	VIN_middle_plane_1	VIN_middle_plane_2	VIN_middle_plane_after_LA
	8.10 a	0	BEA_upper_plane_1	BEA_upper_plane_2	BEA_upper_plane_after_LA			0	VIN_middle_plane_1	VIN_middle_plane_2	VIN_middle_plane_after_LA				BEA_middle_plane_1	1	0.65973	0.48757				VIN_middle_plane_1	1	0.88162	0.75098
		BEA_upper_plane_1	1	0.59226	0.74976			VIN_middle_plane_1	1	0.7513	0.8051				BEA_middle_plane_2	0.65973	1	0.75116				VIN_middle_plane_2	0.88162	1	0.84058
		BEA_upper_plane_2	0.59226	1	0.73027			VIN_middle_plane_2	0.7513	1	0.80949				BEA_middle_plane_after_LA	0.48757	0.75116	1				VIN_middle_plane_after_LA	0.75098	0.84058	1
		BEA_upper_plane_after_LA	0.74976	0.73027	1			VIN_middle_plane_after_LA	0.8051	0.80949	1
															0	BEA_upper_plane_1	BEA_upper_plane_2	BEA_upper_plane_after_LA
		0	BEA_upper_plane_1	BEA_upper_plane_2	BEA_upper_plane_after_LA			0	VIN_middle_plane_1	VIN_middle_plane_2	VIN_middle_plane_after_LA				BEA_upper_plane_1	1	0.59226	0.74976
		BEA_upper_plane_1	1	0.54872	0.44344			VIN_middle_plane_1	1	0.96344	0.81168				BEA_upper_plane_2	0.59226	1	0.73027
		BEA_upper_plane_2	0.54872	1	0.59142			VIN_middle_plane_2	0.96344	1	0.87399				BEA_upper_plane_after_LA	0.74976	0.73027	1
		BEA_upper_plane_after_LA	0.44344	0.59142	1			VIN_middle_plane_after_LA	0.81168	0.87399	1
															0	BEA_middle_plane_1	BEA_middle_plane_2	BEA_middle_plane_after_LA				0	VIN_middle_plane_1	VIN_middle_plane_2	VIN_middle_plane_after_LA
															BEA_middle_plane_1	1	0.84543	0.23251				VIN_middle_plane_1	1	0.97817	0.77949
															BEA_middle_plane_2	0.84543	1	0.18196				VIN_middle_plane_2	0.97817	1	0.7941
															BEA_middle_plane_after_LA	0.23251	0.18196	1				VIN_middle_plane_after_LA	0.77949	0.7941	1
		upper plane														middle plane
		BEA repeated stimuli	BEA corr after LA	VIN repeated stimuli	VIN corr after LA											BEA repeated stimuli	BEA corr after LA	VIN repeated stimuli	VIN corr after LA
		0.9842	0.85047	0.94663	0.81899											0.98316	0.92937	0.97254	0.92081
		0.81537	0.86539	0.83541	0.72893											0.97351	0.87305	0.94663	0.81899
		0.96062	0.87157	0.95485	0.71362											0.89949	0.9047	0.86151	0.79255
		0.93675	0.96551	0.98046	0.9468											0.87875	0.86794	0.85197	0.90466
		0.94339	0.884	0.70197	0.65596											0.94611	0.92886	0.95413	0.73123
		0.85182	0.83547	0.94143	0.91405											0.94441	0.9403	0.93678	0.85509
		0.59226	0.74976	0.7513	0.8051											0.93341	0.70685	0.98088	0.88271
		0.54872	0.44344	0.96344	0.81168											0.65973	0.48757	0.88162	0.75098
																0.59226	0.74976
																0.84543	0.23251	0.97817	0.77949
	average	0.829141	0.808201	0.884436	0.799391
	STDEV	0.0656152	0.0453089	0.115912	0.113455										average	0.865626	0.762091	0.929359	0.826279
	SEM	0.029344	0.0202628	0.0518375	0.0507385											0.0409871	0.0308866	0.0509177	0.0712971
																0.0167329	0.0126094	0.0207871	0.0291069
	TTEST	0.55918		0.0331725
													TTEST			0.149141		0.00535115

## Sheet: C
	middle plane						upper plane
dates	VIN vs BEA before LA	VIN vs BEA after LA					VIN vs BEA before LA	VIN vs BEA after LA
3.7 a	0.43515	0.42923				3.7 a	0.41292	0.39158
						3.7 b	0.65341	0.81037
4.7 a	0.54652	0.46191				4.7 a	0.35017	0.57337
29.6 c	0.59651	0.6608				29.6 c	0.45137	0.68069
						29.6 b	0.63672	0.75492
29.6 a	0.47125	0.61433				29.6 a
26.6 b	0.71323	0.79071				26.6 b	0.61736	0.62723
26.6 a	0.17216	0.46287				26.6 a	-0.12783	0.24588
25.6a	0.21676	0.45692				25.6a	0.3886	0.79387
8.10 b	0.35078	0.40954				8.10 b	0.13943	0.43634
8.10 a	0.12365	0.17157				8.10 a	0.23567	0.27953
7.10 c	0.2761	0.35593
average	0.390211	0.481381					0.375782	0.559378
ttest	0.0278187						0.00356689
